# Supplementary material for: Activation of the p53-MDM4 regulatory axis defines the anti-tumour response to PRMT5 inhibition through its role in regulating cellular splicing
Source: PubMed Central journal article supplement (PMC6018746; doi:10.1038/s41598-018-28002-y), 2018-06-26
Supplement: 41598_2018_28002_MOESM1_ESM.pdf [file 41598_2018_28002_MOESM1_ESM.pdf]

**Activation of the p53-MDM4 regulatory axis defines the anti-tumour response to PRMT5 inhibition through its role in regulating cellular splicing.**

Sarah Gerhart<sup>1</sup>, Wendy Kellner<sup>1</sup>, Christine Thompson<sup>1</sup>, Melissa Pappalardi<sup>1</sup>, Ping Zhang<sup>1</sup>, Rocio Montes de Oca<sup>1</sup>, Elayne Penebre<sup>2</sup>, Kenneth Duncan<sup>2</sup>, Ann Boriack-Sjodin<sup>2</sup>, BaoChau Le<sup>1</sup>, Christina Majer<sup>2</sup>, Michael T. McCabe<sup>1</sup>, Chris Carpenter<sup>1,3</sup>, Neil Johnson<sup>1</sup>, Ryan G. Kruger<sup>1</sup>, Olena Barbash<sup>1,\*</sup>

<sup>1</sup>Epigenetics Discovery Performance Unit, Oncology R&D, GlaxoSmithKline, Collegeville, PA, USA

<sup>2</sup>Epizyme, Inc., Cambridge, MA, USA

<sup>3</sup>Current Affiliation: Rubius Therapeutics, Boston, MA, USA

\*Correspondence to [olena.x.barbash@gsk.com](mailto:olena.x.barbash@gsk.com)

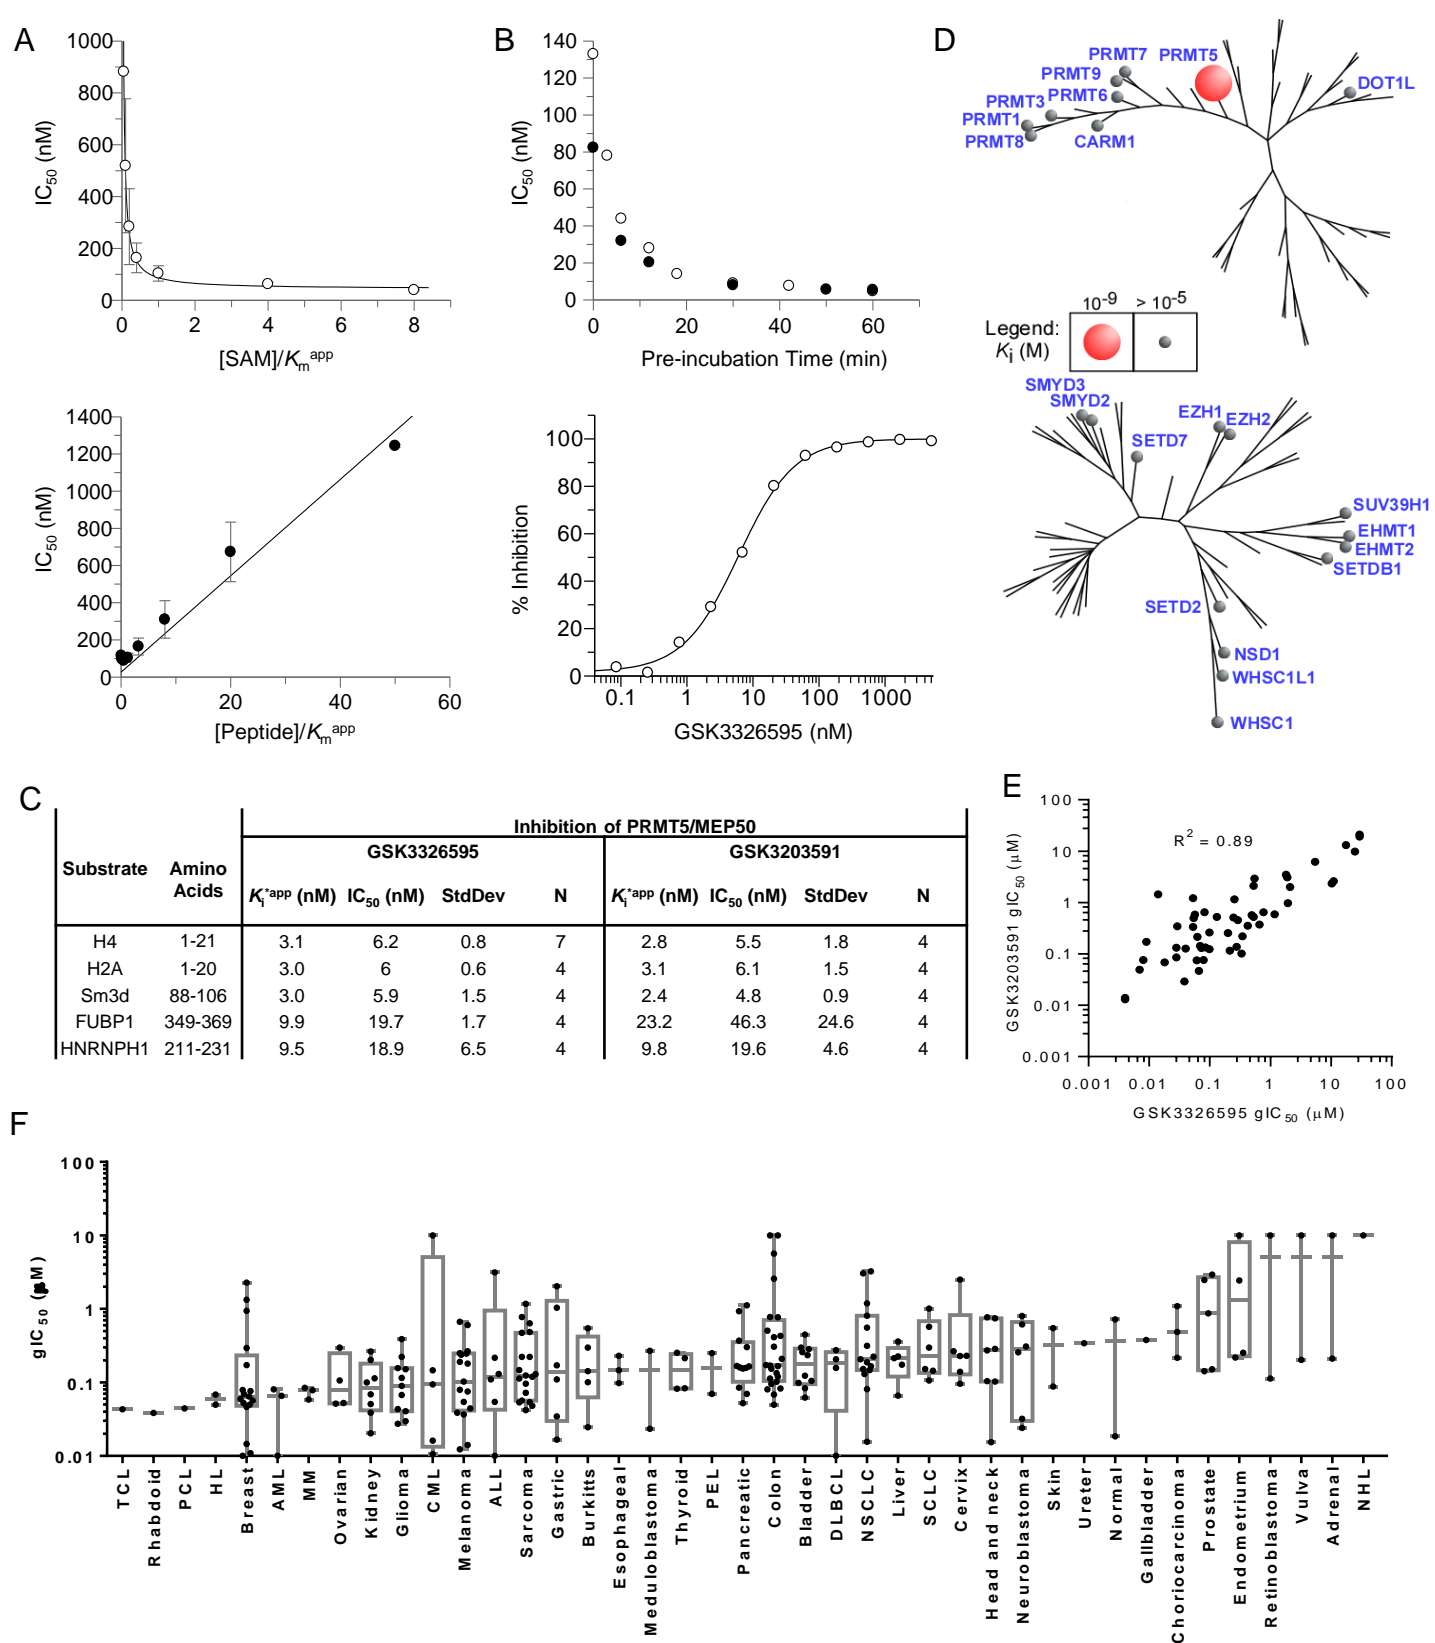

**Supplementary Figure S1. (A)** Plots indicating the mode of inhibition against PRMT5/MEP50 by GSK3362595 according to Cheng-Prusoff relationship where  $IC_{50}$  values are graphed as a function of substrate concentration relative to  $K_m^{app}$  (top panel, SAM; bottom panel, H4 1-21 peptide). Data points (closed vs. open circles) represent two independent experiments. **(B)**  $IC_{50}$  values plotted as a function of Enz:SAM:GSK3326595 preincubation time. The open circles represent data generated using 0.8 nM PRMT5/MEP50 while closed circles represent data with 4 nM PRMT5/MEP50 (top panel). The bottom panel shows a representative  $IC_{50}$  curve for GSK3362595 inhibition of PRMT5/MEP50 activity following a 60 minute Enz:SAM:Inh preincubation fit to a 3-parameter dose-response equation. **(C)** Averaged  $IC_{50}$  values determined following a 60 minute Enz:SAM:Inh preincubation.  $IC_{50}$  values were determined by fitting inhibition data to a 3-parameter dose-response equation.  $K_i^{*app}$  values were calculated from  $IC_{50}$  values using the Cheng-Prusoff equation for a competitive inhibitor. **(D)** Phylogenetic tree highlighting the methyltransferases tested in the selectivity panel. GSK3326595 showed much greater potency for PRMT5 ( $10^{-8}$  M) than for any other tested enzyme ( $\bullet$ ,  $> 10^{-5}$  M). **(E)** Correlation plot comparing  $glC_{50}$  of tool PRMT5 inhibitor, GSK3203591, and candidate PRMT5 inhibitor, GSK3326595, in a panel of cell lines of various tumour types in a 6-day proliferation assay.  $R^2$  value was calculated using the linear regression fitted to these data. **(F)** Box and whisker plots comparing average  $glC_{50}$  values across tumour types following 10 days of treatment with GSK3203591 (TCL- T-cell lymphoma, PCL- plasma cell leukemia, HL- Hodgkin's lymphoma, AML – acute myeloid leukemia, MM- multiple myeloma, CML- chronic myelogenous leukemia, ALL- acute lymphoblastic leukemia, PEL- primary effusion lymphoma, DLBCL- diffuse large B-cell lymphoma, NSCLC- non-small cell lung cancer, SCLC – small cell lung cancer, NHL- non-Hodgkin's lymphoma). Dots represent an average of values for individual cell lines.

A

| GSK3203591/DMSO<br>Fold Change | Protein Name       | Function                |
|--------------------------------|--------------------|-------------------------|
| -141.0                         | LSM4               | Splicing                |
| -22.7                          | ZNF193             | Unknown                 |
| -16.8                          | snRNP B1           | Splicing                |
| -14.5                          | snRNP B1           | Splicing                |
| -8.3                           | N-CoR1             | Transcription           |
| -8.2                           | snRNP B1           | Splicing                |
| -7.8                           | KHSRP              | Splicing, RNA stability |
| -6.8                           | FUBP1              | Splicing, RNA stability |
| -6.6                           | FUBP1              | Splicing, RNA stability |
| -6.3                           | KHSRP              | Splicing, RNA stability |
| -5.7                           | eEF1A1             | Translation             |
| -5.3                           | hnRNP H1; hnRNP H2 | Splicing                |
| -5.2                           | NEURL4             | Centriole organization  |
| -5.1                           | SACM1L             | Unknown                 |
| -5.0                           | hnRNP H1; hnRNP H2 | Splicing                |
| -4.4                           | hnRNP H1; hnRNP H2 | Splicing                |
| -4.0                           | FUBP1              | Splicing, transcription |
| -3.8                           | WDR33              | mRNA processing         |
| -3.8                           | G3BP-2             | RNA binding protein     |
| -3.4                           | hnRNP H1; hnRNP H2 | Splicing                |
| -2.8                           | KHSRP              | Splicing, RNA stability |
| -2.8                           | TOX                | T-cell development      |

**Supplementary Figure S2. (A)** PRMT5 target proteins were identified using MethylScan™ technology in Z-138. More negative fold change values correspond to the greatest effect.

**A**

|           | <u>MDM4 splicing</u> | <u>Z-138</u> | <u>SU-DHL-6</u> | <u>JVM-2</u> | <u>SU-DHL-5</u> | <u>MAVER-1</u> | <u>MINO</u> | <u>SU-DHL-4</u> | <u>REC-1</u> |
|-----------|----------------------|--------------|-----------------|--------------|-----------------|----------------|-------------|-----------------|--------------|
| Day 3 FDR |                      | 1.0E-11      | 7.3E-03         | 3.8E-04      | 2.4E-03         | 1.5E-03        | 9.6E-02     | 6.9E-02         | 4.5E-01      |
| Day 6 FDR |                      | 1.1E-10      | 1.6E-01         | 2.4E-07      | 1.3E-10         | 4.6E-02        | 1.2E-05     | 0.0E+00         | 8.5E-01      |

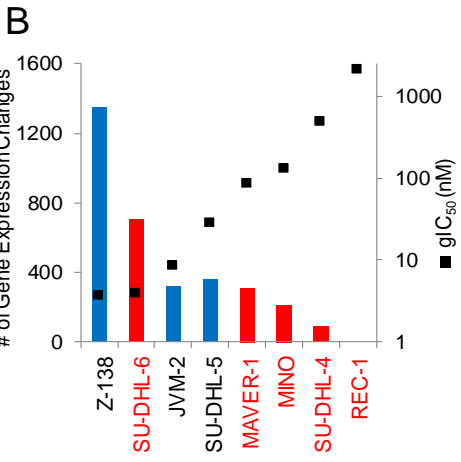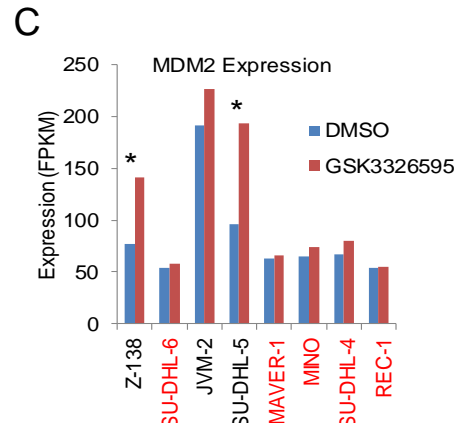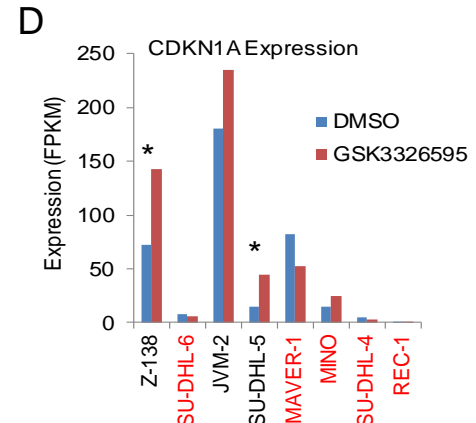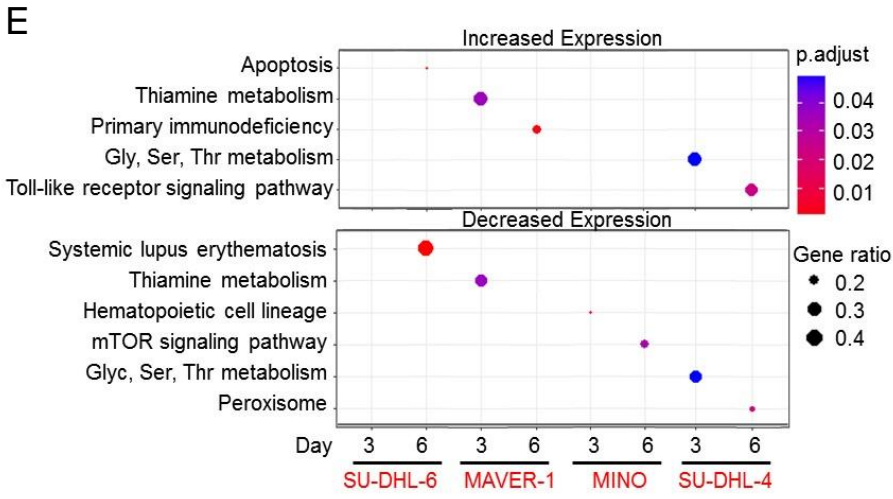

**Supplementary Figure S3.** **(A)** FDR values from rMATS alternative splicing output of MDM4 exon 6 skipping event upon treatment with GSK3326595 for 3 or 6 days. p53 mutant cell lines are highlighted in red. **(B)** The total number of significantly changed genes from days 3 and 6 are plotted against the  $GI_{50}$  for that cell line. The Spearman and Pearson correlations demonstrate a correlation between number of gene expression changes and sensitivity to PRMT5 inhibition. p53 mutant cell lines are highlighted in red. The FPKM values reported from CuffDiff outputs for **(C)** MDM2 and **(D)** CDKN1A. p53 mutant cell lines are highlighted in red. **(E)** Significantly changed genes in p53 mutant cell lines were submitted for MsigDB enrichment analysis (Broad) and the most significantly changed gene set for each is reported.

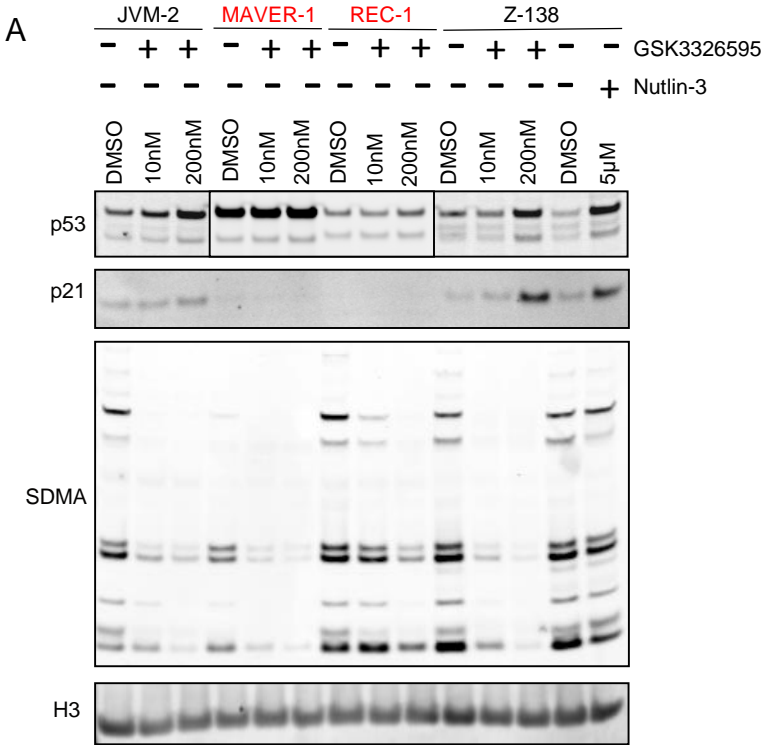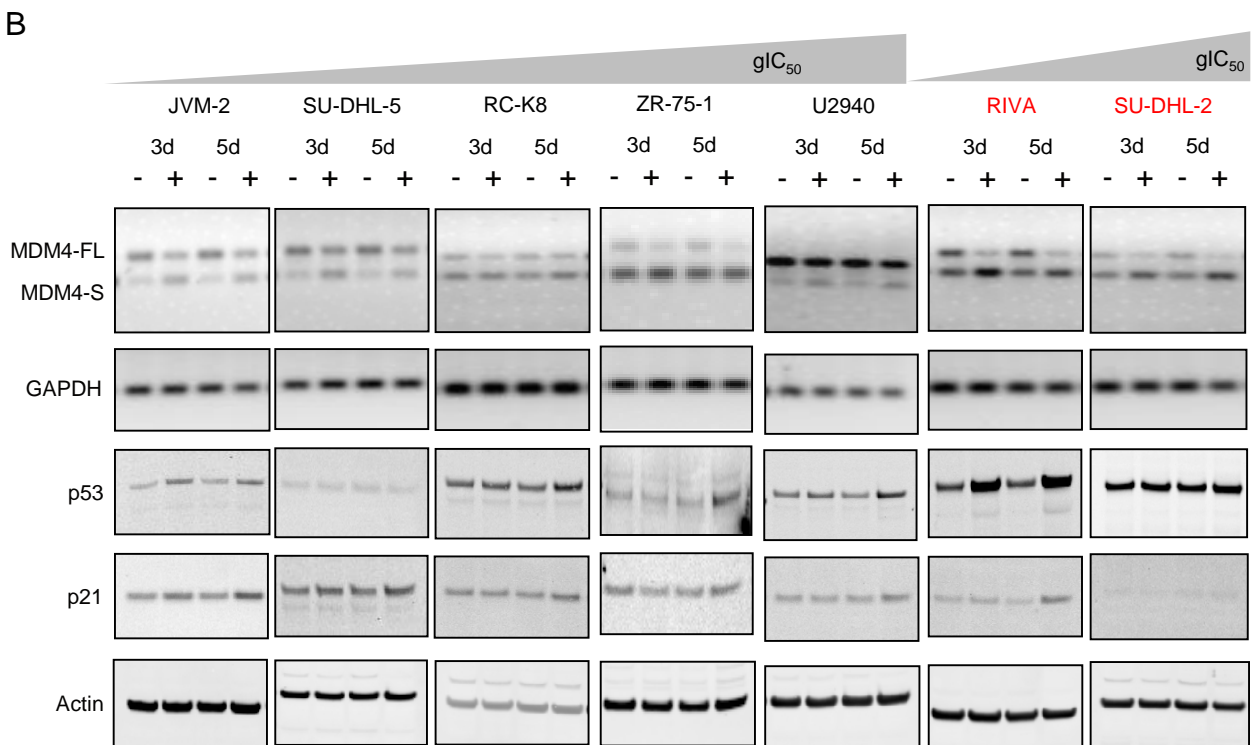



**Supplementary Figure S4. (A)** Western blot showing a p53 and p21 dose response in a panel of MCL cell lines following 3 days of treatment with 10 nM or 200 nM GSK3326595 in a panel of mantle cell lymphoma cell lines. A 5  $\mu$ M Nutlin-3 treatment condition was also included as a positive control for p53 activation. **(B)** MDM4 splicing and p53/p21 induction in an additional panel of p53 wild-type (black text) and mutant (red text) lymphoma cell lines treated with DMSO (-) or 200nM GSK3326595 (+) for 3 or 5 days arranged in order of increasing  $gIC_{50}$  value in a 6-day proliferation assay with GSK3326595.

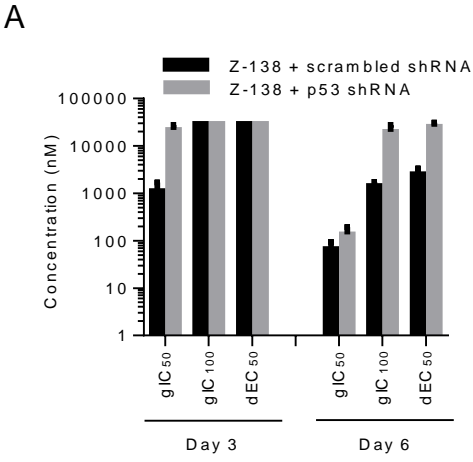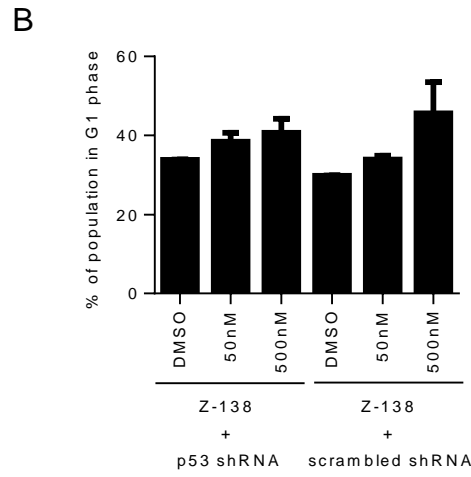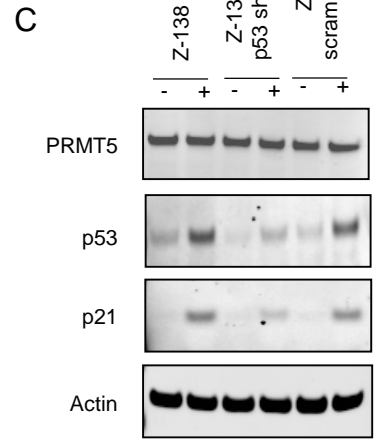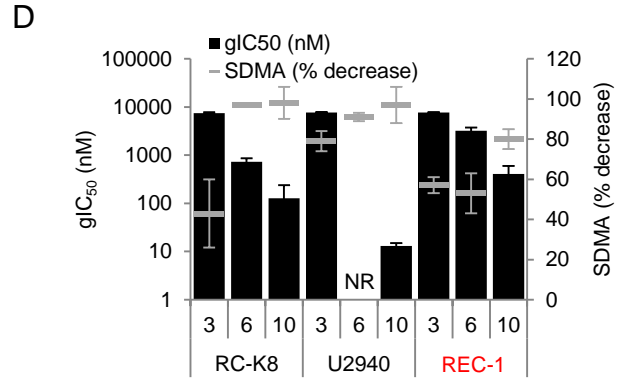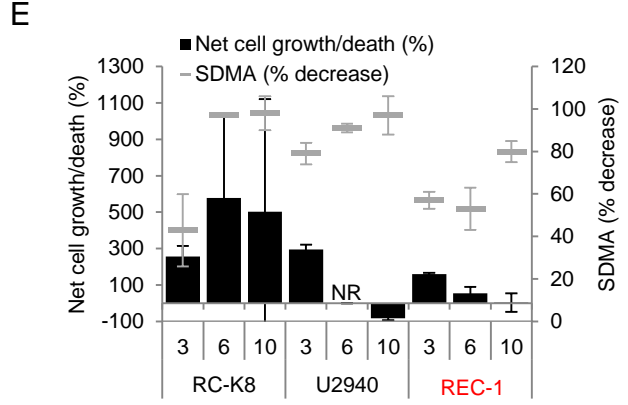

**Supplementary Figure S5. (A)** Effect of p53 knockdown via lentiviral transduction of p53 shRNA on proliferation in Z-138 cells following 3 or 6 days of GSK3203591 treatment with respect to  $gIC_{50}$ ,  $gIC_{100}$ , and  $dEC_{50}$  parameters. Transduction of a scrambled, non-targeting shRNA was used as a negative control. **(B)** Effect of p53 knockdown via lentiviral transduction of p53 shRNA on G1 cell cycle phase in Z-138 cells following 4 days of treatment with DMSO, 50 nM, or 500 nM GSK3203591. **(C)** Western blot showing the effect of p53 knockdown via lentiviral transduction of p53 shRNA on p53 and p21 protein levels in Z-138 cells following 4 days of 1  $\mu$ M GSK3203591 (+) or DMSO (-) treatment. **(D)**  $gIC_{50}$  and **(E)** net cell growth/death values from a 6-day growth/death assay with GSK3326595 (black bars) are plotted with % decrease in SDMA (gray rectangles) for 3-, 6-, and 10-day treatment time points. p53 mutant cell lines in red.

**A**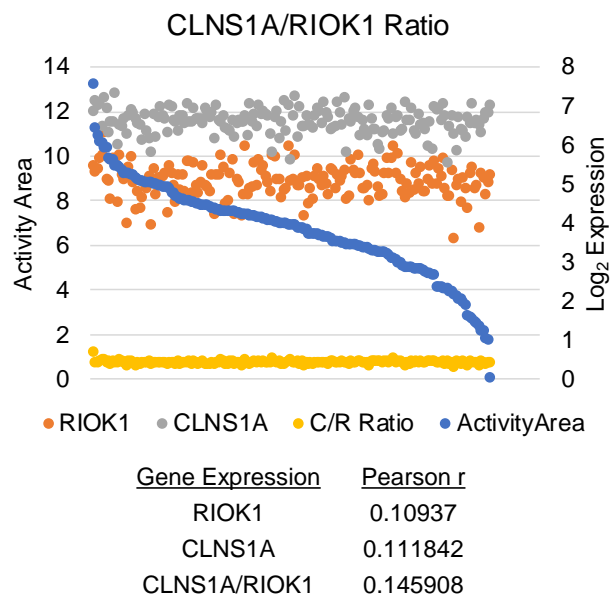**B**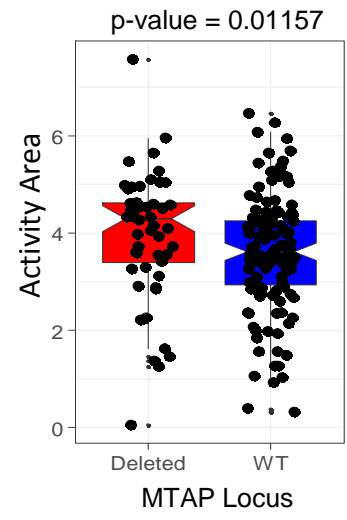

**Supplementary Figure S6. (A)** Gene expression of CLNS1A, RIOK1, and the ratio of the two in 184 cell lines plotted by decreasing sensitivity. Pearson correlations with sensitivity are also shown for each parameter. **(B)** Activity area from proliferation assays are compared between MTAP homozygous deleted cell lines and those with at least one functional copy of MTAP. The result of a Wilcoxon rank sum test is shown.

**A**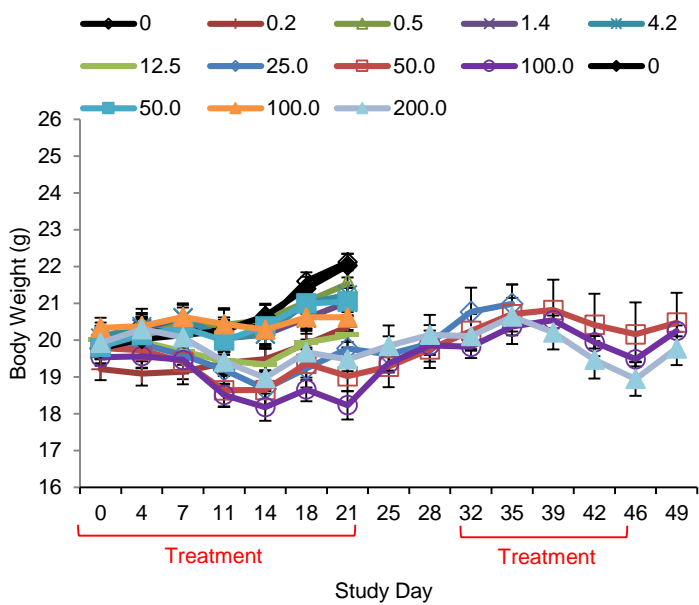**B**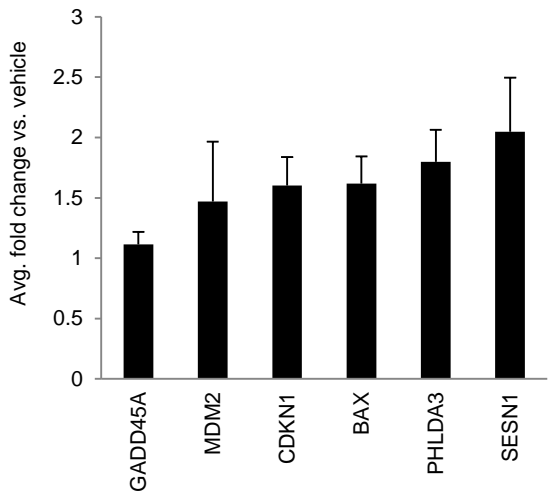

**Supplementary Figure S7. (A)** Body weight changes in S.C. Z-138 tumour bearing mice treated with GSK3326595. Treatments that resulted in significant decreases in tumour volume were placed on a treatment holiday for 10 days. Treatments were reinstated on day 32 for 2 weeks followed by a one week holiday. The 25 mg/kg dose group were euthanized on day 35 due to tumour burden. Day 53 data not available for this data set. **(B)** p53 target gene expression change in Z-138 tumor xenografts after 7 days of 100 mg/kg BID GSK3326595 treatment compared to vehicle control.

Full scans to accompany Figure 4A

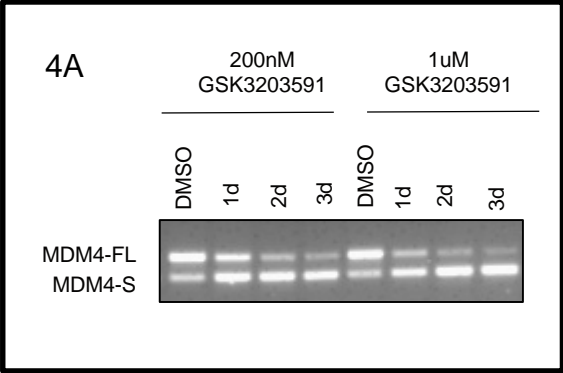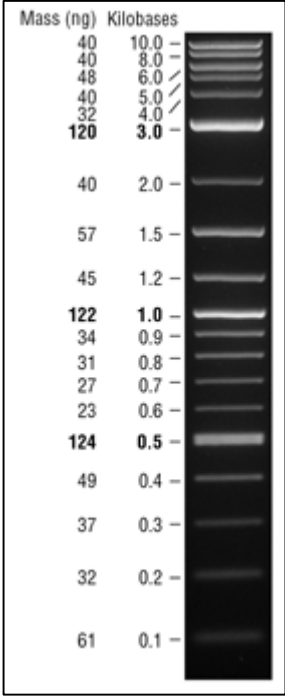

Quick-Load 2-Log DNA Ladder  
(New England BioLabs #N0469S)

MDM4

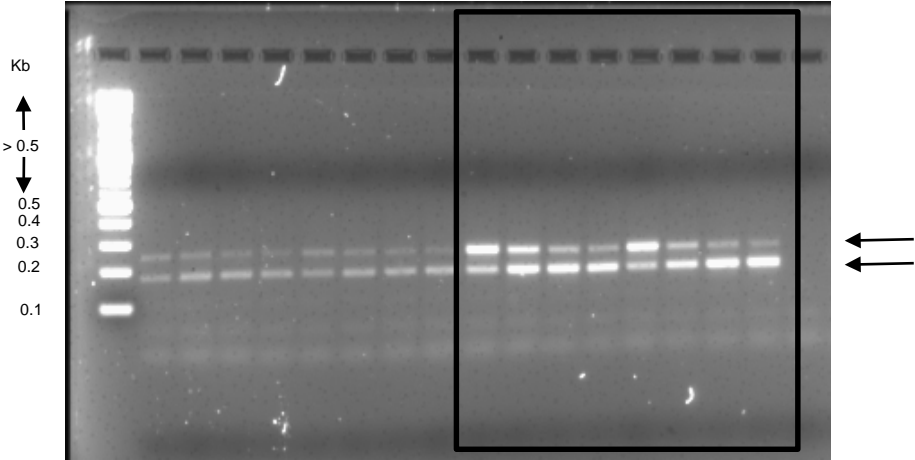



Full scans to accompany Figure 4B

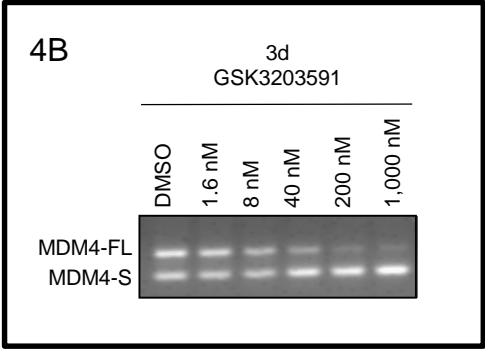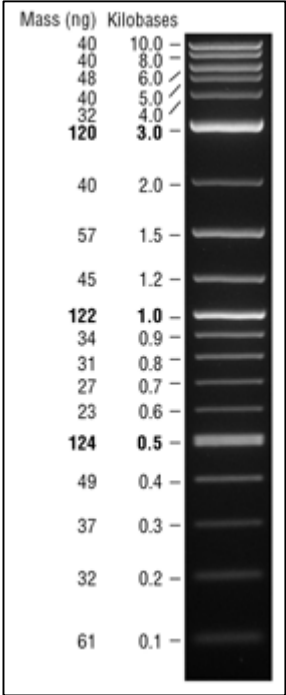

Quick-Load 2-Log DNA Ladder  
(New England BioLabs #N0469S)

MDM4

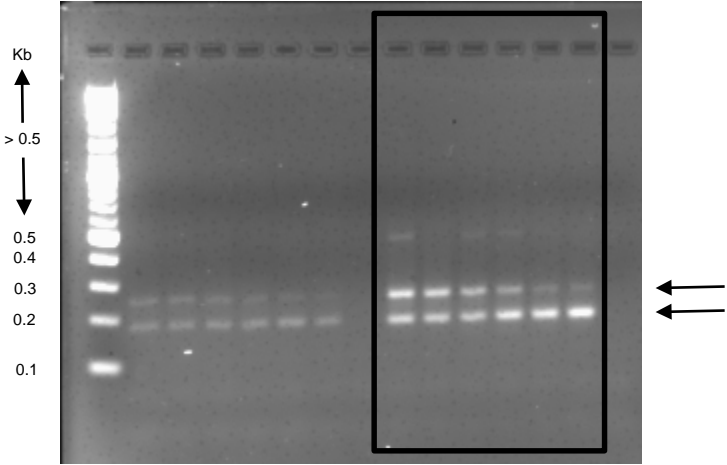

Full scans to accompany Figure 4C

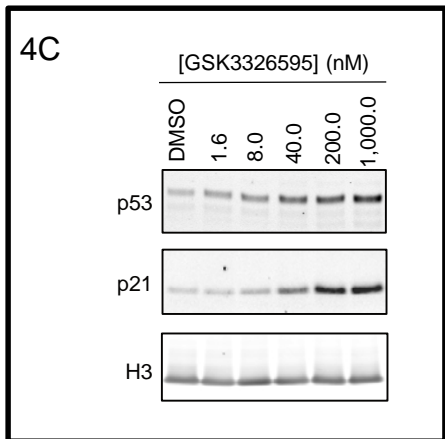

| Protein                | Approximate Molecular Weights (kDa) |         |                         |                          |                                  |
|------------------------|-------------------------------------|---------|-------------------------|--------------------------|----------------------------------|
|                        | Tris-Glycine                        | Tricine | NuPAGE <sup>®</sup> MES | NuPAGE <sup>®</sup> MOPS | NuPAGE <sup>®</sup> Tris-Acetate |
| Myosin                 | 250                                 | 210     | 198                     | 191                      | 210                              |
| Phosphorylase          | 148                                 | 105     | 98                      | 97                       | 111                              |
| BSA                    | 98                                  | 78      | 62                      | 64                       | 71                               |
| Glutamic Dehydrogenase | 64                                  | 55      | 49                      | 51                       | 55                               |
| Alcohol Dehydrogenase  | 50                                  | 45      | 38                      | 39                       | 41                               |
| Carbonic Anhydrase     | 36                                  | 34      | 28                      | 28                       | n/a                              |
| Myoglobin Red          | 22                                  | 17      | 17                      | 19                       | n/a                              |
| Lysozyme               | 16                                  | 16      | 14                      | 14                       | n/a                              |
| Aprotinin              | 6                                   | 7       | 6                       | n/a                      | n/a                              |
| Insulin, B Chain       | 4                                   | 4       | 3                       | n/a                      | n/a                              |

NuPAGE<sup>®</sup> Novex Bis-Tris 4-12% Gel  
©1999-2002 Invitrogen Corporation. All rights reserved. IM-1008F 072602

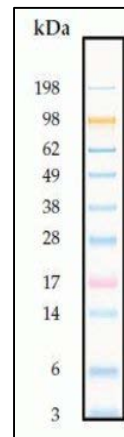

SeeBlue Plus2 Pre-stained Protein Standard (Invitrogen #LC5925)

p53

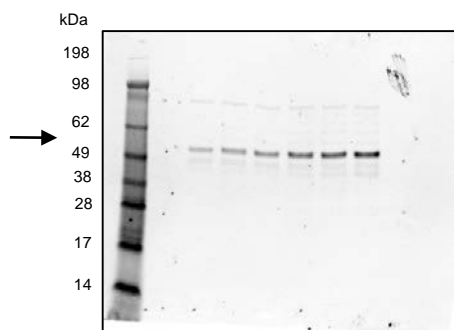

p21

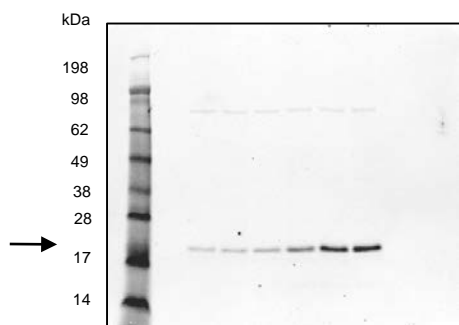

H3

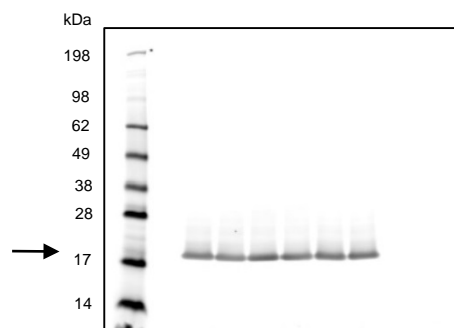

Full Scans to accompany Supplementary Figure S4A

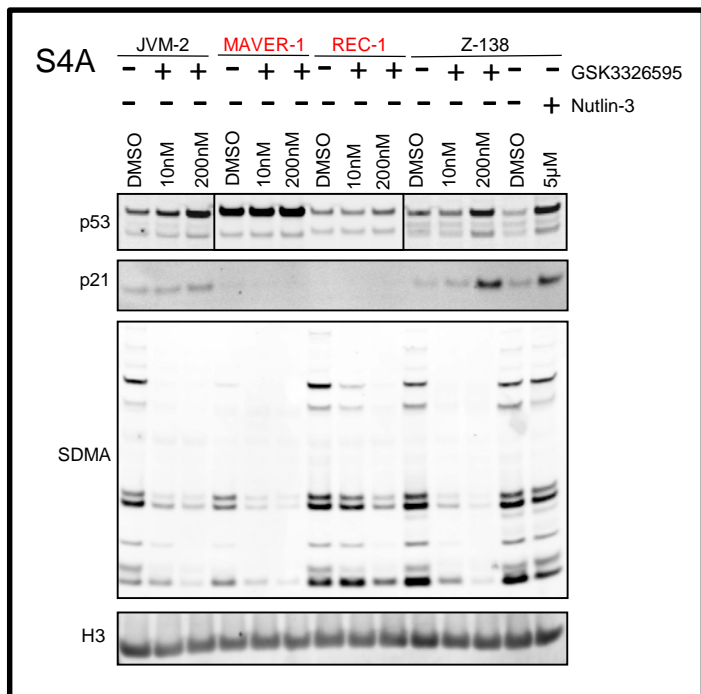

| Protein                | Approximate Molecular Weights (kDa) |         |             |              |                      |
|------------------------|-------------------------------------|---------|-------------|--------------|----------------------|
|                        | Tris-Glycine                        | Tricine | NuPAGE® MES | NuPAGE® MOPS | NuPAGE® Tris-Acetate |
| Myosin                 | 250                                 | 210     | 198         | 191          | 210                  |
| Phosphorylase          | 148                                 | 105     | 98          | 97           | 111                  |
| BSA                    | 98                                  | 78      | 62          | 64           | 71                   |
| Glutamic Dehydrogenase | 64                                  | 55      | 49          | 51           | 55                   |
| Alcohol Dehydrogenase  | 50                                  | 45      | 38          | 39           | 41                   |
| Carbonic Anhydrase     | 36                                  | 34      | 28          | 28           | n/a                  |
| Myoglobin Red          | 22                                  | 17      | 17          | 19           | n/a                  |
| Lysozyme               | 16                                  | 16      | 14          | 14           | n/a                  |
| Aprotinin              | 6                                   | 7       | 6           | n/a          | n/a                  |
| Insulin, B Chain       | 4                                   | 4       | 3           | n/a          | n/a                  |

NuPAGE® Novex Bis-Tris 4-12% Gel  
© 1999-2002 Invitrogen Corporation. All rights reserved. DM-1008F 072602

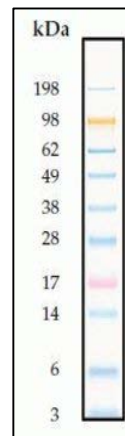

SeeBlue Plus2 Pre-stained Protein Standard (Invitrogen #LC5925)

p53 (low exposure)

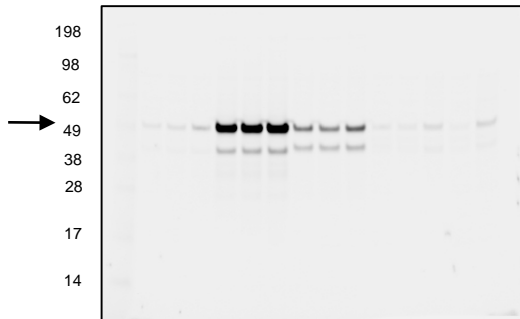

p53 (high exposure)

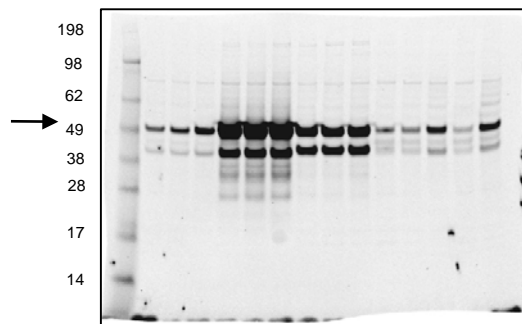

p21

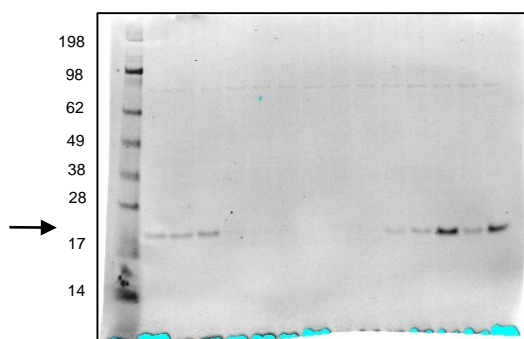

SDMA

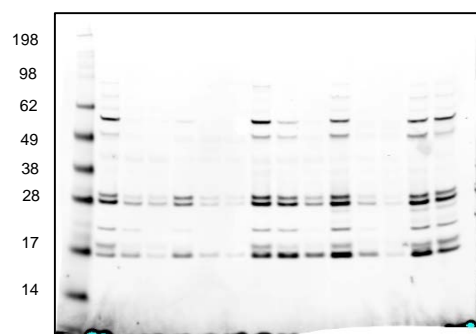

H3

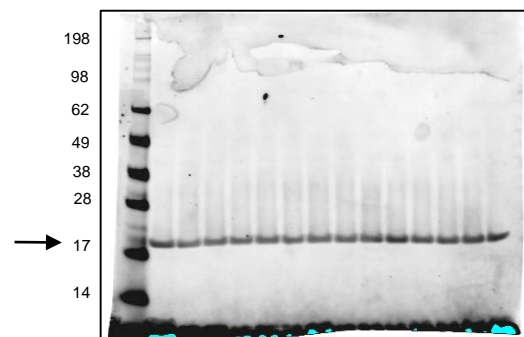

Full scans to accompany Figure 5B

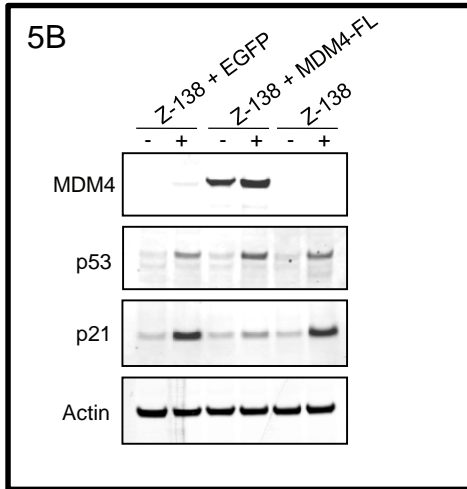

| Protein                | Approximate Molecular Weights (kDa) |         |                         |                          |                                  |
|------------------------|-------------------------------------|---------|-------------------------|--------------------------|----------------------------------|
|                        | Tris-Glycine                        | Tricine | NaPAGE <sup>®</sup> MES | NaPAGE <sup>®</sup> MOPS | NaPAGE <sup>®</sup> Tris-Acetate |
| Myosin                 | 250                                 | 210     | 198                     | 191                      | 210                              |
| Phosphorylase          | 148                                 | 105     | 98                      | 97                       | 111                              |
| BSA                    | 98                                  | 78      | 62                      | 64                       | 71                               |
| Glutamic Dehydrogenase | 64                                  | 55      | 49                      | 51                       | 55                               |
| Alcohol Dehydrogenase  | 50                                  | 45      | 38                      | 39                       | 41                               |
| Carbonic Anhydrase     | 36                                  | 34      | 28                      | 28                       | n/a                              |
| Myoglobin Red          | 22                                  | 17      | 17                      | 19                       | n/a                              |
| Lysozyme               | 16                                  | 16      | 14                      | 14                       | n/a                              |
| Aprotinin              | 6                                   | 7       | 6                       | n/a                      | n/a                              |
| Insulin, B Chain       | 4                                   | 4       | 3                       | n/a                      | n/a                              |

NaPAGE<sup>®</sup> Novex  
Bis-Tris 4-12% Gel

©1999-2002 Invitrogen Corporation. All rights reserved. IM-1008F 072602

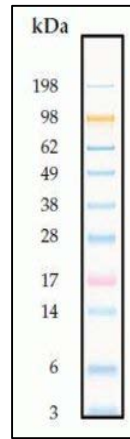

SeeBlue Plus2 Pre-stained Protein Standard (Invitrogen #LC5925)

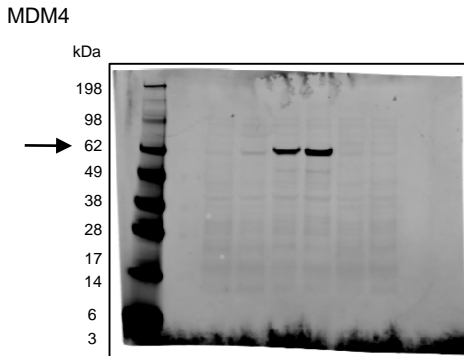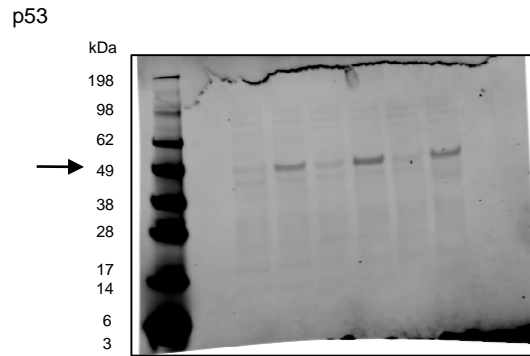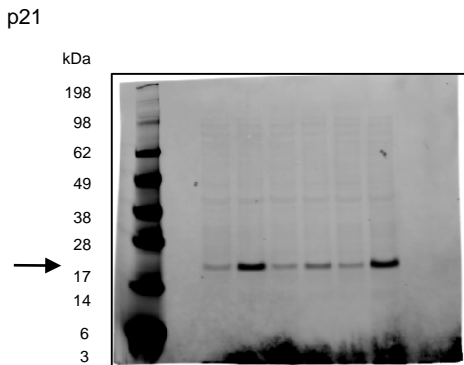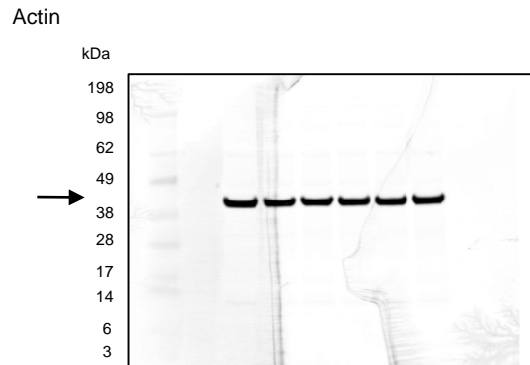

Full scans to accompany Figure 5E

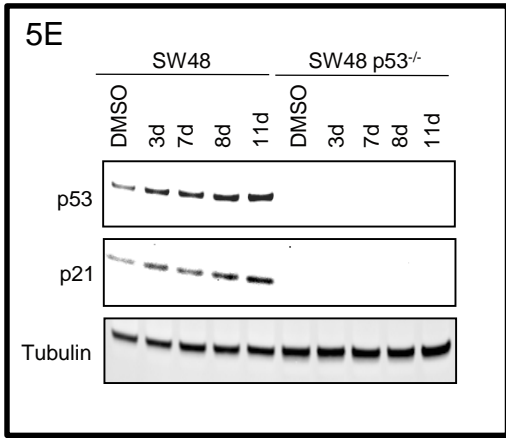

| Protein                | Approximate Molecular Weights (kDa) |         |                         |                          |                                  |
|------------------------|-------------------------------------|---------|-------------------------|--------------------------|----------------------------------|
|                        | Tris-Glycine                        | Tricine | NaPAGE <sup>®</sup> MES | NaPAGE <sup>®</sup> MOPS | NaPAGE <sup>®</sup> Tris-Acetate |
| Myosin                 | 250                                 | 210     | 198                     | 191                      | 210                              |
| Phosphorylase          | 148                                 | 105     | 98                      | 97                       | 111                              |
| BSA                    | 98                                  | 78      | 62                      | 64                       | 71                               |
| Glutamic Dehydrogenase | 64                                  | 55      | 49                      | 51                       | 55                               |
| Alcohol Dehydrogenase  | 50                                  | 45      | 38                      | 39                       | 41                               |
| Carbonic Anhydrase     | 36                                  | 34      | 28                      | 28                       | n/a                              |
| Myoglobin Red          | 22                                  | 17      | 17                      | 19                       | n/a                              |
| Lysozyme               | 16                                  | 16      | 14                      | 14                       | n/a                              |
| Aprotinin              | 6                                   | 7       | 6                       | n/a                      | n/a                              |
| Insulin, B Chain       | 4                                   | 4       | 3                       | n/a                      | n/a                              |

NaPAGE<sup>®</sup> Novex  
Bis-Tris 4-12% Gel  
©1999-2002 Invitrogen Corporation. All rights reserved. IM-1008F 072602

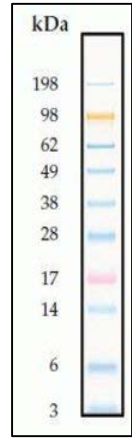

SeeBlue Plus2 Pre-stained Protein Standard (Invitrogen #LC5925)

p53

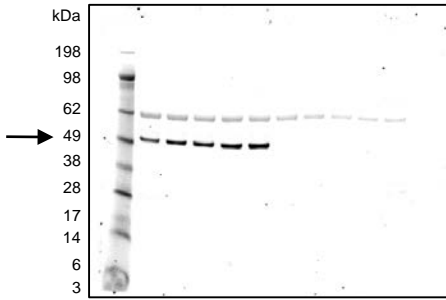

p21

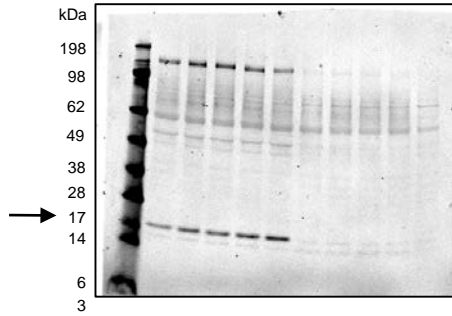

Tubulin

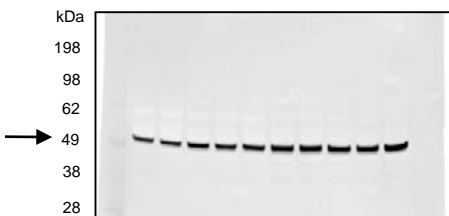

Full Scans to accompany Supplementary Figure S5C

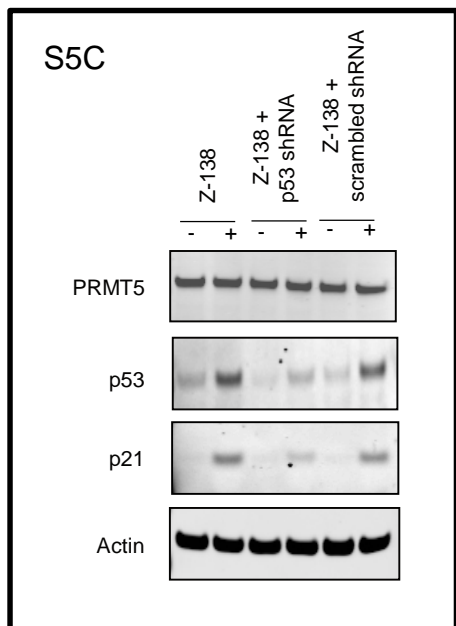

| Protein                | Approximate Molecular Weights (kDa) |                |                       |                        |                                |
|------------------------|-------------------------------------|----------------|-----------------------|------------------------|--------------------------------|
|                        | Tris-Glycine<br>250                 | Tricine<br>210 | NaPAGE®<br>MES<br>198 | NaPAGE®<br>MOPS<br>191 | NaPAGE®<br>Tris-Acetate<br>210 |
| Myosin                 |                                     |                |                       |                        |                                |
| Phosphorylase          | 148                                 | 105            | 98                    | 97                     | 111                            |
| BSA                    | 98                                  | 78             | 62                    | 64                     | 71                             |
| Glutamic Dehydrogenase | 64                                  | 55             | 49                    | 51                     | 55                             |
| Alcohol Dehydrogenase  | 50                                  | 45             | 38                    | 39                     | 41                             |
| Carbonic Anhydrase     | 36                                  | 34             | 28                    | 28                     | n/a                            |
| Myoglobin Red          | 22                                  | 17             | 17                    | 19                     | n/a                            |
| Lysozyme               | 16                                  | 16             | 14                    | 14                     | n/a                            |
| Aprotinin              | 6                                   | 7              | 6                     | n/a                    | n/a                            |
| Insulin, B Chain       | 4                                   | 4              | 3                     | n/a                    | n/a                            |

NaPAGE® Novex  
Bis-Tris 4-12% Gel  
© 1999-2002 Invitrogen Corporation. All rights reserved. DM-1008F 072602

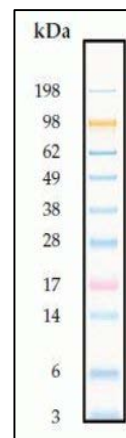

SeeBlue Plus2 Pre-stained Protein Standard (Invitrogen #LC5925)

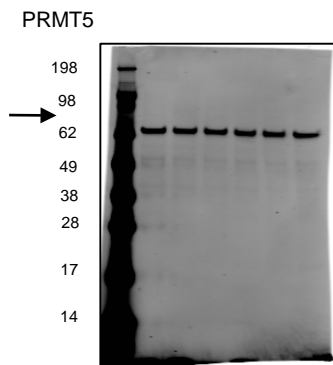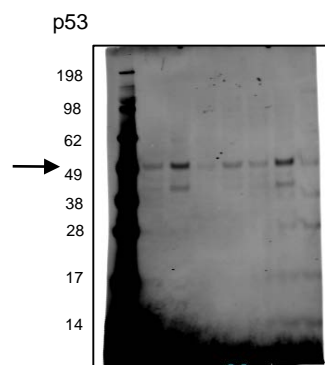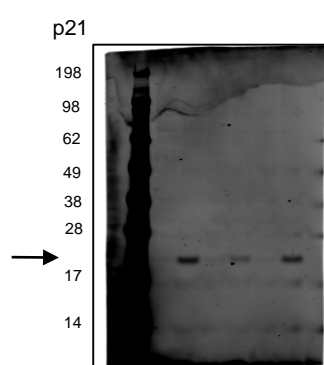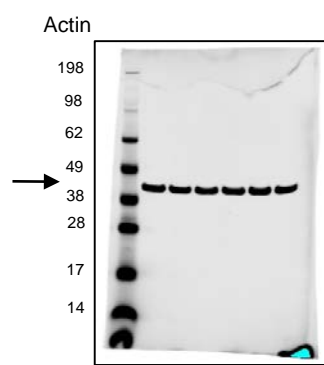

Full scans to accompany Figure 6F

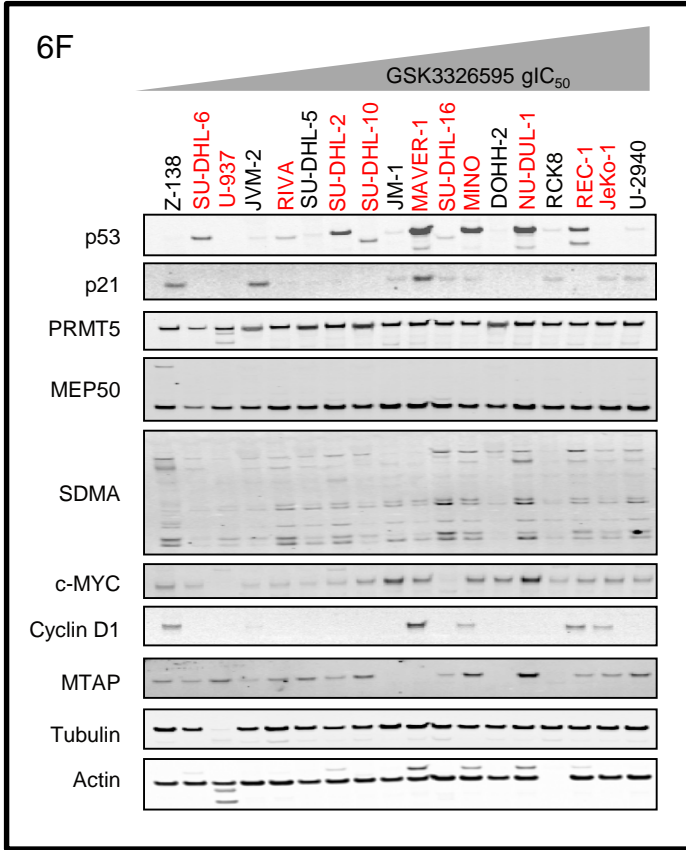

| Protein                | Approximate Molecular Weights (kDa) |         |                         |                          |                                  |
|------------------------|-------------------------------------|---------|-------------------------|--------------------------|----------------------------------|
|                        | Tris-Glycine                        | Tricine | NuPAGE <sup>®</sup> MES | NuPAGE <sup>®</sup> MOPS | NuPAGE <sup>®</sup> Tris-Acetate |
| Myosin                 | 250                                 | 210     | 198                     | 191                      | 210                              |
| Phosphorylase          | 148                                 | 105     | 98                      | 97                       | 111                              |
| BSA                    | 98                                  | 78      | 62                      | 64                       | 71                               |
| Glutamic Dehydrogenase | 64                                  | 55      | 49                      | 51                       | 55                               |
| Alcohol Dehydrogenase  | 50                                  | 45      | 38                      | 39                       | 41                               |
| Carbonic Anhydrase     | 36                                  | 34      | 28                      | 28                       | n/a                              |
| Myoglobin Red          | 22                                  | 17      | 17                      | 19                       | n/a                              |
| Lysozyme               | 16                                  | 16      | 14                      | 14                       | n/a                              |
| Aprotinin              | 6                                   | 7       | 6                       | n/a                      | n/a                              |
| Insulin, B Chain       | 4                                   | 4       | 3                       | n/a                      | n/a                              |

NuPAGE<sup>®</sup> Novex Bis-Tris 4-12% Gel  
©1999-2002 Invitrogen Corporation. All rights reserved. IM-1008F 072602

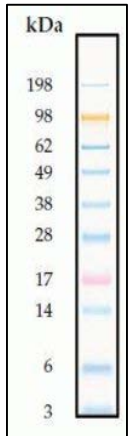

SeeBlue Plus2 Pre-stained Protein Standard (Invitrogen #LC5925)

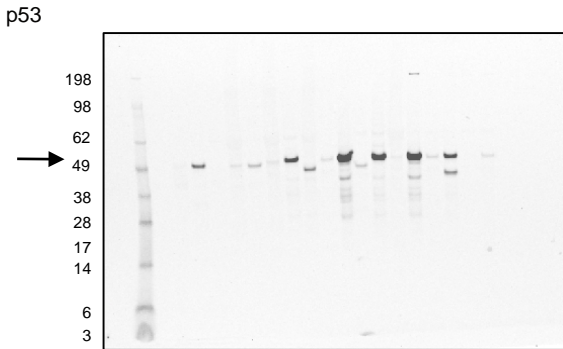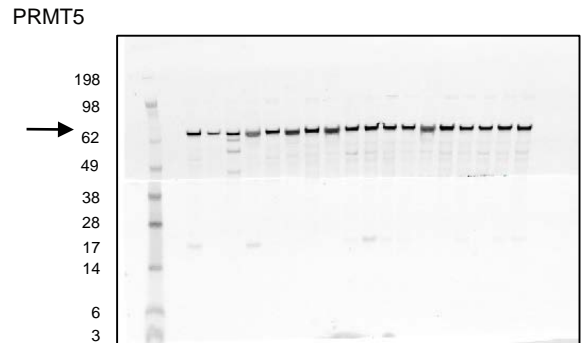

Blot was cut between molecular weight markers 38kDa and 49kDa. Top portion was probed with PRMT5 antibody and bottom portion was probed with p21 antibody.

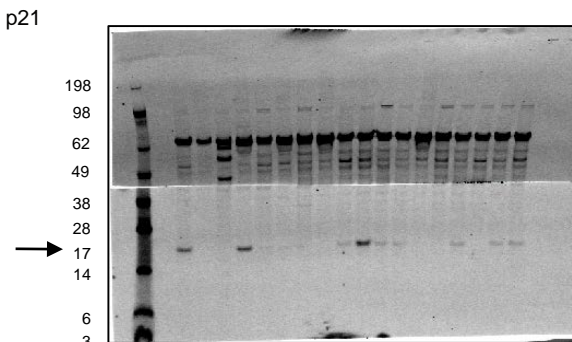

Blot was cut between molecular weight markers 38kDa and 49kDa. Top portion was probed with PRMT5 antibody and bottom portion was probed with p21 antibody.

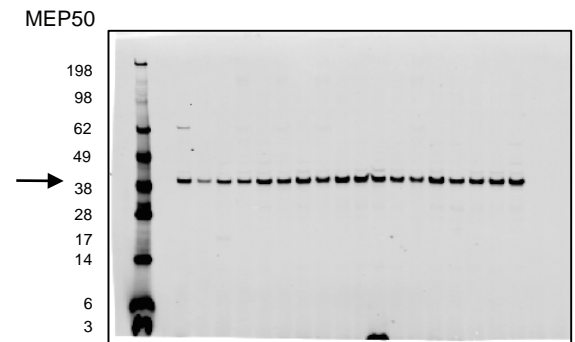



# Full scans to accompany Figure 6F (continued)

SDMA

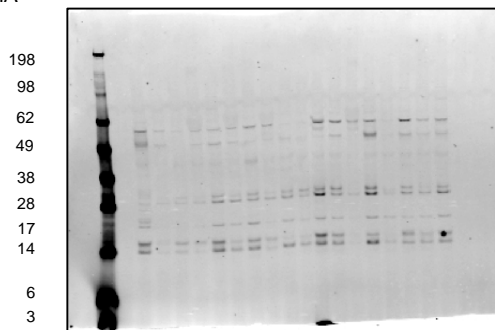

MTAP

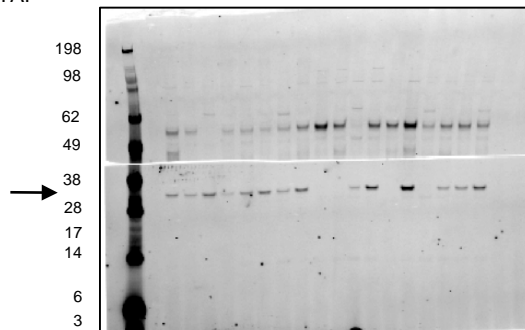

Blot was cut between molecular weight markers 38kDa and 49kDa. Top portion was probed with c-MYC antibody and bottom portion was probed with MTAP antibody.

c-MYC

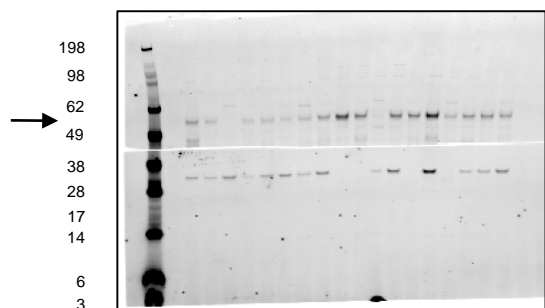

Blot was cut between molecular weight markers 38kDa and 49kDa. Top portion was probed with c-MYC antibody and bottom portion was probed with MTAP antibody.

Tubulin

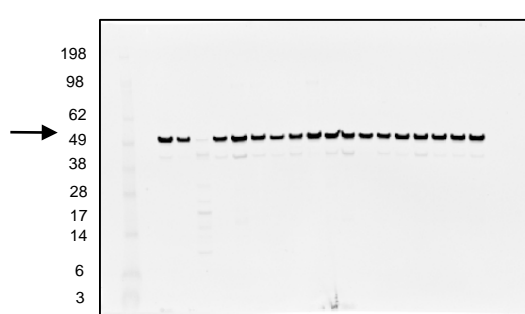

Cyclin D1

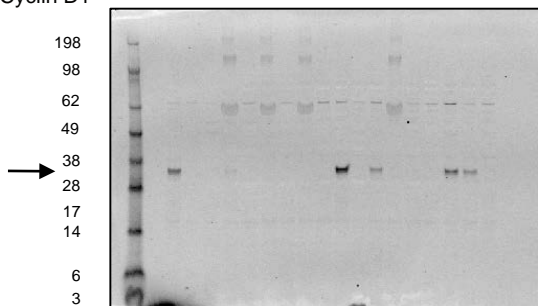

Actin

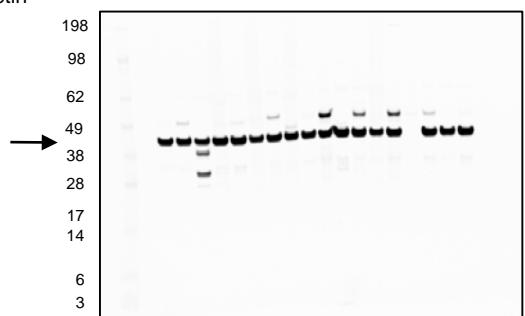







**Supplementary Table 2: Correlation Between GSK3203591 and GSK3326595 6-day Proliferation Assay Data**

| Cell Line  | gIC50 (uM) |            |
|------------|------------|------------|
|            | GSK3326595 | GSK3203591 |
| 5637       | 0.069      | 0.143      |
| A172       | 1.167      | 0.590      |
| BJAB       | 1.900      | 3.100      |
| DOHH-2     | 0.213      | 0.116      |
| HCC1143    | 0.246      | 0.509      |
| HCC1806    | 0.098      | 0.261      |
| HCC70      | 0.130      | 0.522      |
| HT-1376    | 17.599     | 13.130     |
| J82        | 29.326     | 20.947     |
| JeKo-1     | 5.402      | 6.191      |
| JM1        | 0.079      | 0.076      |
| JVM-2      | 0.009      | 0.172      |
| KMS-11     | 0.066      | 0.047      |
| LN-229     | 0.254      | 1.150      |
| LP1        | 1.945      | 0.975      |
| MAVER-1    | 0.085      | 0.133      |
| MCF-7      | 0.062      | 0.215      |
| MDA-MB-231 | 0.544      | 2.928      |
| MDA-MB-453 | 0.029      | 0.343      |
| MDA-MB-468 | 0.057      | 0.585      |
| MINO       | 0.130      | 0.536      |
| NCI-H526   | 0.275      | 0.138      |
| NCI-H526-R | 0.344      | 0.219      |
| NU-DHL-1   | 0.333      | 0.101      |
| PER-403    | 0.038      | 0.029      |
| PER-624    | 0.524      | 0.526      |
| PER-704    | 0.658      | 0.375      |
| Pfeiffer   | 0.421      | 0.352      |
| RCK8       | 0.529      | 2.110      |
| REC-1      | 2.108      | 1.994      |
| RIVA       | 0.018      | 0.068      |
| RL         | 0.014      | 1.434      |
| ScaBER     | 0.198      | 0.255      |
| SF295      | 24.722     | 9.843      |
| SF539      | 0.061      | 0.075      |
| SK-BR-3    | 0.073      | 0.131      |
| SU-DHL-10  | 0.054      | 0.495      |
| SU-DHL-16  | 0.099      | 0.124      |
| SU-DHL-2   | 0.028      | 0.086      |
| SU-DHL-4   | 0.492      | 0.571      |

|           |        |        |
|-----------|--------|--------|
| SU-DHL-5  | 0.028  | 0.132  |
| SU-DHL-6  | 0.004  | 0.013  |
| SU-DHL-8  | 0.053  | 1.220  |
| SW-780    | 0.290  | 0.451  |
| T24       | 0.765  | 0.650  |
| U251MG    | 1.798  | 3.491  |
| U2932     | 0.053  | 0.336  |
| U2940     | 10.176 | 2.349  |
| U-87MG    | 0.040  | 0.127  |
| U937      | 0.007  | 0.049  |
| UM-UC-3   | 29.326 | 19.169 |
| WSU-DLCL2 | 0.082  | 0.651  |
| WSU-NHL   | 0.008  | 0.076  |
| Z-138     | 0.004  | 0.014  |
| ZR-75-1   | 10.974 | 2.615  |

**Supplementary Table 3: gIC50 and Activity Area values for 10-day Proliferation Assay (Eurofins panel)**

| CellLine   | gIC50 (nM) | ActivityArea | TumorType |
|------------|------------|--------------|-----------|
| SW-13      | 211        | 3.37         | Adrenal   |
| NCI-H295R  | 10000      | 1.23         | Adrenal   |
| MOLT-3     | 217        | 3.72         | ALL       |
| NALM-6     | 110        | 4.32         | ALL       |
| MOLT-16    | 54.2       | 4.95         | ALL       |
| CEM-C1     | 7.92       | 6.64         | ALL       |
| Jurkat     | 130        | 4.17         | ALL       |
| CCRFCEM    | 3140       | 1.25         | ALL       |
| MV-4-11    | 65.8       | 4.8          | AML       |
| HEL-92-1-7 | 9.02       | 6.46         | AML       |
| Thp1       | 80.5       | 4.51         | AML       |
| UM-UC-3    | 105        | 4.49         | Bladder   |
| TCCSUP     | 235        | 2.85         | Bladder   |
| T24        | 449        | 2.76         | Bladder   |
| BFTC-905   | 259        | 3.46         | Bladder   |
| SCaBER     | 123        | 4.22         | Bladder   |
| HT-1197    | 98.9       | 4.47         | Bladder   |
| J82        | 83.1       | 4.4          | Bladder   |
| 647-V      | 62         | 4.91         | Bladder   |
| 5637.000   | 285        | 3.5          | Bladder   |
| HT1376     | 297        | 3.48         | Bladder   |
| EFM-19     | 69.5       | 4.42         | Breast    |
| T47D       | 52.4       | 4.07         | Breast    |
| MDA MB 468 | 4.83       | 5.05         | Breast    |
| KPL-1      | 1330       | 1.92         | Breast    |
| MT-3       | 46.4       | 4.72         | Breast    |
| CAMA-1     | 78.9       | 4.27         | Breast    |
| MX1        | 294        | 3.29         | Breast    |
| BT474      | 172        | 3.41         | Breast    |
| SK-BR-3    | 76.4       | 4.28         | Breast    |
| AU565      | 14.6       | 5.44         | Breast    |
| MDA MB 453 | 64.5       | 4.23         | Breast    |
| MCF7       | 10.9       | 5.15         | Breast    |
| MDA-MB-436 | 49.7       | 5.04         | Breast    |
| MDA MB 231 | 56.7       | 5            | Breast    |
| BT-549     | 59.4       | 2.74         | Breast    |
| Hs 578T    | 947        | 2.06         | Breast    |
| BT20       | 2280       | 1.46         | Breast    |
| ST486      | 101        | 4.41         | Burkitts  |
| Daudi      | 142        | 4.05         | Burkitts  |
| Raji       | 24.5       | 5.64         | Burkitts  |

|              |       |      |                 |
|--------------|-------|------|-----------------|
| EB-3         | 299   | 3.45 | Burkitts        |
| Ramos (RA 1) | 546   | 2.79 | Burkitts        |
| DoTc2 4510   | 95.8  | 4.42 | Cervix          |
| C-4 I        | 139   | 4.13 | Cervix          |
| C-4 II       | 266   | 3.54 | Cervix          |
| HeLa         | 230   | 3.51 | Cervix          |
| C-33A        | 228   | 3.45 | Cervix          |
| SiHa         | 2510  | 1.55 | Cervix          |
| JEG-3        | 216   | 3.81 | Choriocarcinoma |
| JAR          | 485   | 2.95 | Choriocarcinoma |
| BeWo         | 1090  | 2.24 | Choriocarcinoma |
| BV-173       | 10.6  | 6.26 | CML             |
| EM-2         | 94    | 4.54 | CML             |
| CML-T1       | 16.1  | 5.95 | CML             |
| MEG01        | 10000 | 0.05 | CML             |
| K562         | 146   | 3.97 | CML             |
| Colo 201     | 49.6  | 4.93 | Colon           |
| LS-174T      | 170   | 3.99 | Colon           |
| SW480        | 413   | 3.2  | Colon           |
| RKO-AS45-1   | 113   | 4.31 | Colon           |
| RKO          | 772   | 2.71 | Colon           |
| SW48         | 10000 | 1.59 | Colon           |
| HCT-116      | 166   | 3.91 | Colon           |
| NCI-H747     | 2580  | 1.56 | Colon           |
| SW620        | 5640  | 1.26 | Colon           |
| SW948        | 120   | 4.1  | Colon           |
| HT-29        | 95.2  | 4.32 | Colon           |
| Colo 205     | 10000 | 1.03 | Colon           |
| WiDr         | 505   | 2.38 | Colon           |
| SW837        | 102   | 4.23 | Colon           |
| Colo 320 HSR | 80.3  | 4.49 | Colon           |
| DLD-1        | 134   | 4.13 | Colon           |
| RKOE6        | 210   | 3.66 | Colon           |
| SW403        | 153   | 3.67 | Colon           |
| HCT-15       | 68.4  | 4.77 | Colon           |
| Colo 320DM   | 82.5  | 4.65 | Colon           |
| LS1034       | 172   | 3.85 | Colon           |
| NCI-H508     | 307   | 3.48 | Colon           |
| HCT-8        | 430   | 3.18 | Colon           |
| SW1417       | 773   | 2.59 | Colon           |
| DOHH-2       | 157   | 3.95 | DLBCL           |
| DB           | 2.51  | 7.57 | DLBCL           |
| SR           | 275   | 3.44 | DLBCL           |
| HT           | 206   | 3.58 | DLBCL           |
| AN3 CA       | 254   | 3.37 | Endometrium     |
| HEC-1-A      | 2440  | 1.98 | Endometrium     |
| KLE          | 10000 | 1.05 | Endometrium     |

|               |      |      |                |
|---------------|------|------|----------------|
| RL95-2        | 218  | 3.47 | Endometrium    |
| OE21          | 146  | 3.99 | Esophageal     |
| OE19          | 98   | 4.45 | Esophageal     |
| OE33          | 231  | 3.7  | Esophageal     |
| OCUG-1        | 379  | 3.12 | Gallbladder    |
| SNU-16        | 34.4 | 5.36 | Gastric        |
| AGS           | 2030 | 1.49 | Gastric        |
| SNU-1         | 1040 | 2.25 | Gastric        |
| SNU-5         | 110  | 4.34 | Gastric        |
| KATO III      | 16.7 | 6.09 | Gastric        |
| HS 746T       | 171  | 3.86 | Gastric        |
| SW1088        | 40.5 | 5.09 | Glioma         |
| DBTRG-05MG    | 156  | 2.13 | Glioma         |
| A172          | 29.6 | 5.28 | Glioma         |
| U-87 MG       | 67.6 | 3.26 | Glioma         |
| DK-MG         | 89.5 | 4.52 | Glioma         |
| H4            | 151  | 3.91 | Glioma         |
| T98G          | 27.3 | 5.47 | Glioma         |
| SNB-19        | 223  | 3.27 | Glioma         |
| CCF-STTG1     | 115  | 4.32 | Glioma         |
| SW1783        | 389  | 2.92 | Glioma         |
| U-138MG       | 43.3 | 5.04 | Glioma         |
| L-428         | 330  | 2.98 | HL             |
| RPMI 6666     | 748  | 2.6  | HL             |
| Cal 27        | 103  | 4.46 | HN             |
| Detroit 562   | 104  | 4.36 | HN             |
| SCC-9         | 747  | 2.69 | HN             |
| SCC-4         | 286  | 2.85 | HN             |
| SCC-25        | 273  | 3.32 | HN             |
| SW1463        | 770  | 2.36 | HN             |
| FaDu          | 15.4 | 6.08 | HN sq          |
| Caki-1        | 68.8 | 4.79 | Kidney         |
| G-402         | 99.7 | 4.3  | Kidney         |
| Caki-2        | 114  | 4.32 | Kidney         |
| 786-O         | 20.3 | 5.64 | Kidney         |
| A498          | 50.7 | 5.01 | Kidney         |
| ACHN          | 38.6 | 5.27 | Kidney         |
| 769-P         | 203  | 3.75 | Kidney         |
| SK-NEP-1      | 264  | 2.87 | Kidney         |
| HuCCT1        | 225  | 3.52 | Liver          |
| HUH-6 Clone 5 | 361  | 3.09 | Liver          |
| SNU-423       | 66   | 4.77 | Liver          |
| HepG2         | 214  | 3.55 | Liver          |
| HLE           | 174  | 3.77 | Liver          |
| D283 Med      | 23.5 | 5.48 | Meduloblastoma |
| Daoy          | 270  | 3.56 | Meduloblastoma |
| COLO 829      | 54.4 | 4.09 | Melanoma       |

|            |       |      |               |
|------------|-------|------|---------------|
| Hs 695T    | 602   | 2.82 | Melanoma      |
| Hs 294T    | 12.3  | 5.68 | Melanoma      |
| SH-4       | 75.2  | 4.66 | Melanoma      |
| A7         | 36.7  | 5.29 | Melanoma      |
| C32        | 14.1  | 5.08 | Melanoma      |
| HMCB       | 666   | 2.33 | Melanoma      |
| C32TG      | 103   | 4.15 | Melanoma      |
| MeWo       | 249   | 3.7  | Melanoma      |
| SK-MEL-1   | 38.7  | 5.04 | Melanoma      |
| SK-MEL-3   | 181   | 3.38 | Melanoma      |
| SK-MEL-28  | 239   | 3.48 | Melanoma      |
| A101D      | 190   | 3.47 | Melanoma      |
| RPMI-7951  | 44.2  | 5.08 | Melanoma      |
| A375       | 79.6  | 4.05 | Melanoma      |
| CHL-1      | 247   | 3.6  | Melanoma      |
| MALME3M    | 265   | 3.55 | Melanoma      |
| RPMI 8226  | 58.4  | 4.58 | MM            |
| U266B1     | 78.5  | 4.18 | MM            |
| SKO-007    | 84.4  | 4.01 | MM            |
| CHP-212    | 24    | 5.24 | Neuroblastoma |
| SK-N-FI    | 308   | 3.32 | Neuroblastoma |
| MC-IXC     | 615   | 2.67 | Neuroblastoma |
| SK-N-AS    | 31.9  | 3.45 | Neuroblastoma |
| SK-N-DZ    | 257   | 3.65 | Neuroblastoma |
| BE(2)C     | 803   | 2.42 | Neuroblastoma |
| MHH-PREB-1 | 10000 | 0.38 | NHL           |
| Wi38       | 18.5  | 3.96 | Normal        |
| BPH1       | 718   | 2.74 | Normal        |
| ChaGoK1    | 1190  | 2.06 | NSCLC         |
| NCI-H460   | 224   | 3.53 | NSCLC         |
| A427       | 130   | 4.02 | NSCLC         |
| NCI-H596   | 188   | 2.89 | NSCLC         |
| COR-L105   | 314   | 3.49 | NSCLC         |
| NCIH441    | 556   | 2.88 | NSCLC         |
| Calu6      | 206   | 3.34 | NSCLC         |
| COR-L23    | 147   | 4.15 | NSCLC         |
| NCI-H292   | 166   | 3.25 | NSCLC         |
| SW900      | 3250  | 1.26 | NSCLC         |
| Calu1      | 3050  | 1.37 | NSCLC         |
| SKMES1     | 807   | 2.26 | NSCLC         |
| NCI-H661   | 152   | 3.94 | NSCLC         |
| A549       | 80.9  | 4.57 | NSCLC         |
| NCI-H520   | 15.6  | 5.93 | NSCLC sq      |
| ES-2       | 106   | 4.24 | Ovarian       |
| OVCAR3     | 51.4  | 5.03 | Ovarian       |
| CaOV3      | 298   | 3.4  | Ovarian       |
| SKOV3      | 52.6  | 4.21 | Ovarian       |



|            |       |      |                      |
|------------|-------|------|----------------------|
| Mia PaCa-2 | 158   | 3.75 | Pancreatic           |
| HPAF-II    | 154   | 4.05 | Pancreatic           |
| Hs 766T    | 1120  | 1.62 | Pancreatic           |
| BxPC-3     | 160   | 3.87 | Pancreatic           |
| AsPC-1     | 302   | 3.26 | Pancreatic           |
| Capan-2    | 69.7  | 4.63 | Pancreatic           |
| HuP-T4     | 84.9  | 4.21 | Pancreatic           |
| PANC-1     | 165   | 3.97 | Pancreatic           |
| CFPAC-1    | 52.3  | 4.98 | Pancreatic           |
| YAPC       | 168   | 3.88 | Pancreatic           |
| SU.86.86   | 934   | 2.2  | Pancreatic           |
| Capan-1    | 370   | 2.9  | Pancreatic           |
| BC-1       | 69.6  | 4.67 | PEL                  |
| CRO-AP2    | 250   | 3.58 | PEL                  |
| ARH-77     | 44.4  | 4.72 | Plasma cell leukimia |
| PC-3       | 873   | 2.36 | Prostate             |
| BM-1604    | 142   | 4.01 | Prostate             |
| DU145      | 151   | 4.02 | Prostate             |
| 22Rv1      | 2480  | 1.97 | Prostate             |
| LNCaP      | 2930  | 1.61 | Prostate             |
| Y79        | 113   | 3.36 | Retinoblastoma       |
| HT-3       | 10000 | 0.92 | Retinoblastoma       |
| G-401      | 38.4  | 5.26 | Rhabdoid             |
| RD         | 639   | 2.85 | Sarcoma              |
| SJRH30     | 472   | 3.11 | Sarcoma              |
| SW872      | 54    | 4.97 | Sarcoma              |
| MES-SA     | 72    | 4.58 | Sarcoma              |
| SK-UT-1    | 42.1  | 5.16 | Sarcoma              |
| MG-63      | 96    | 4.31 | Sarcoma              |
| SaOS2      | 48.2  | 5.07 | Sarcoma              |
| TE 381.T   | 147   | 3.97 | Sarcoma              |
| A204       | 223   | 3.73 | Sarcoma              |
| SW982      | 56.7  | 4.95 | Sarcoma              |
| SW1353     | 129   | 4.23 | Sarcoma              |
| SJSA1      | 773   | 2.34 | Sarcoma              |
| SK-LMS-1   | 113   | 4.24 | Sarcoma              |
| A-673      | 119   | 4.12 | Sarcoma              |
| HT-1080    | 53.5  | 4.05 | Sarcoma              |
| KHOS-240S  | 124   | 3.92 | Sarcoma              |
| HOS        | 223   | 3.72 | Sarcoma              |
| U2OS       | 485   | 3.08 | Sarcoma              |
| SW684      | 1170  | 1.84 | Sarcoma              |
| DMS273     | 298   | 3.1  | SCLC                 |
| DMS53      | 106   | 4.19 | SCLC                 |
| NCI-H69    | 144   | 3.22 | SCLC                 |
| DMS114     | 1010  | 2.35 | SCLC                 |
| SHP-77     | 152   | 2.98 | SCLC                 |

|            |       |      |         |
|------------|-------|------|---------|
| NCIH446    | 570   | 2.88 | SCLC    |
| A431       | 549   | 2.85 | Skin    |
| HLF        | 87.7  | 4.6  | Skin    |
| J-RT3-T3-5 | 43.2  | 5.09 | TCL     |
| CAL-62     | 253   | 3.65 | Thyroid |
| CGTH-W-1   | 82.2  | 4.62 | Thyroid |
| SW579      | 83.3  | 4.6  | Thyroid |
| BHT-101    | 214   | 3.72 | Thyroid |
| 639-V      | 342   | 3.41 | Ureter  |
| SW962      | 203   | 3.58 | Vulva   |
| SW954      | 10000 | 0.31 | Vulva   |

| Account             | Account Description       | 2011-12 Budget | 2011-12 Actual | 2011-12 Variance | 2011-12 % Variance | 2011-12 % Actual |
|---------------------|---------------------------|----------------|----------------|------------------|--------------------|------------------|
| 1000-0000-0000-0000 | Operating Expenses        | 10000000       | 10000000       | 0                | 0%                 | 100%             |
| 1000-0000-0000-0001 | Salaries and Wages        | 4000000        | 4000000        | 0                | 0%                 | 100%             |
| 1000-0000-0000-0002 | Travel Expenses           | 100000         | 100000         | 0                | 0%                 | 100%             |
| 1000-0000-0000-0003 | Communications            | 500000         | 500000         | 0                | 0%                 | 100%             |
| 1000-0000-0000-0004 | Printing and Reproduction | 200000         | 200000         | 0                | 0%                 | 100%             |
| 1000-0000-0000-0005 | Information Technology    | 1000000        | 1000000        | 0                | 0%                 | 100%             |
| 1000-0000-0000-0006 | Professional Fees         | 1000000        | 1000000        | 0                | 0%                 | 100%             |
| 1000-0000-0000-0007 | Equipment                 | 100000         | 100000         | 0                | 0%                 | 100%             |
| 1000-0000-0000-0008 | Supplies                  | 200000         | 200000         | 0                | 0%                 | 100%             |
| 1000-0000-0000-0009 | Other Expenses            | 100000         | 100000         | 0                | 0%                 | 100%             |
| 1000-0000-0000-0010 | Capital Expenses          | 1000000        | 1000000        | 0                | 0%                 | 100%             |
| 1000-0000-0000-0011 | Capital Assets            | 1000000        | 1000000        | 0                | 0%                 | 100%             |





















|      |       |       |       |
|------|-------|-------|-------|
| 1000 | 00000 | 00000 | 00000 |
| 1001 | 00001 | 00001 | 00001 |
| 1002 | 00002 | 00002 | 00002 |
| 1003 | 00003 | 00003 | 00003 |
| 1004 | 00004 | 00004 | 00004 |
| 1005 | 00005 | 00005 | 00005 |
| 1006 | 00006 | 00006 | 00006 |
| 1007 | 00007 | 00007 | 00007 |
| 1008 | 00008 | 00008 | 00008 |
| 1009 | 00009 | 00009 | 00009 |
| 1010 | 00010 | 00010 | 00010 |
| 1011 | 00011 | 00011 | 00011 |
| 1012 | 00012 | 00012 | 00012 |
| 1013 | 00013 | 00013 | 00013 |
| 1014 | 00014 | 00014 | 00014 |
| 1015 | 00015 | 00015 | 00015 |
| 1016 | 00016 | 00016 | 00016 |
| 1017 | 00017 | 00017 | 00017 |
| 1018 | 00018 | 00018 | 00018 |
| 1019 | 00019 | 00019 | 00019 |
| 1020 | 00020 | 00020 | 00020 |
| 1021 | 00021 | 00021 | 00021 |
| 1022 | 00022 | 00022 | 00022 |
| 1023 | 00023 | 00023 | 00023 |
| 1024 | 00024 | 00024 | 00024 |
| 1025 | 00025 | 00025 | 00025 |
| 1026 | 00026 | 00026 | 00026 |
| 1027 | 00027 | 00027 | 00027 |
| 1028 | 00028 | 00028 | 00028 |
| 1029 | 00029 | 00029 | 00029 |
| 1030 | 00030 | 00030 | 00030 |
| 1031 | 00031 | 00031 | 00031 |
| 1032 | 00032 | 00032 | 00032 |
| 1033 | 00033 | 00033 | 00033 |
| 1034 | 00034 | 00034 | 00034 |
| 1035 | 00035 | 00035 | 00035 |
| 1036 | 00036 | 00036 | 00036 |
| 1037 | 00037 | 00037 | 00037 |
| 1038 | 00038 | 00038 | 00038 |
| 1039 | 00039 | 00039 | 00039 |
| 1040 | 00040 | 00040 | 00040 |
| 1041 | 00041 | 00041 | 00041 |
| 1042 | 00042 | 00042 | 00042 |
| 1043 | 00043 | 00043 | 00043 |
| 1044 | 00044 | 00044 | 00044 |
| 1045 | 00045 | 00045 | 00045 |
| 1046 | 00046 | 00046 | 00046 |
| 1047 | 00047 | 00047 | 00047 |
| 1048 | 00048 | 00048 | 00048 |
| 1049 | 00049 | 00049 | 00049 |
| 1050 | 00050 | 00050 | 00050 |
| 1051 | 00051 | 00051 | 00051 |
| 1052 | 00052 | 00052 | 00052 |
| 1053 | 00053 | 00053 | 00053 |
| 1054 | 00054 | 00054 | 00054 |
| 1055 | 00055 | 00055 | 00055 |
| 1056 | 00056 | 00056 | 00056 |
| 1057 | 00057 | 00057 | 00057 |
| 1058 | 00058 | 00058 | 00058 |
| 1059 | 00059 | 00059 | 00059 |
| 1060 | 00060 | 00060 | 00060 |
| 1061 | 00061 | 00061 | 00061 |
| 1062 | 00062 | 00062 | 00062 |
| 1063 | 00063 | 00063 | 00063 |
| 1064 | 00064 | 00064 | 00064 |
| 1065 | 00065 | 00065 | 00065 |
| 1066 | 00066 | 00066 | 00066 |
| 1067 | 00067 | 00067 | 00067 |
| 1068 | 00068 | 00068 | 00068 |
| 1069 | 00069 | 00069 | 00069 |
| 1070 | 00070 | 00070 | 00070 |
| 1071 | 00071 | 00071 | 00071 |
| 1072 | 00072 | 00072 | 00072 |
| 1073 | 00073 | 00073 | 00073 |
| 1074 | 00074 | 00074 | 00074 |
| 1075 | 00075 | 00075 | 00075 |
| 1076 | 00076 | 00076 | 00076 |
| 1077 | 00077 | 00077 | 00077 |
| 1078 | 00078 | 00078 | 00078 |
| 1079 | 00079 | 00079 | 00079 |
| 1080 | 00080 | 00080 | 00080 |
| 1081 | 00081 | 00081 | 00081 |
| 1082 | 00082 | 00082 | 00082 |
| 1083 | 00083 | 00083 | 00083 |
| 1084 | 00084 | 00084 | 00084 |
| 1085 | 00085 | 00085 | 00085 |
| 1086 | 00086 | 00086 | 00086 |
| 1087 | 00087 | 00087 | 00087 |
| 1088 | 00088 | 00088 | 00088 |
| 1089 | 00089 | 00089 | 00089 |
| 1090 | 00090 | 00090 | 00090 |
| 1091 | 00091 | 00091 | 00091 |
| 1092 | 00092 | 00092 | 00092 |
| 1093 | 00093 | 00093 | 00093 |
| 1094 | 00094 | 00094 | 00094 |
| 1095 | 00095 | 00095 | 00095 |
| 1096 | 00096 | 00096 | 00096 |
| 1097 | 00097 | 00097 | 00097 |
| 1098 | 00098 | 00098 | 00098 |
| 1099 | 00099 | 00099 | 00099 |
| 1100 | 00100 | 00100 | 00100 |









|      |      |      |  |
|------|------|------|--|
| 0200 | 0200 | 0200 |  |
| 0201 | 0201 | 0201 |  |
| 0202 | 0202 | 0202 |  |
| 0203 | 0203 | 0203 |  |
| 0204 | 0204 | 0204 |  |
| 0205 | 0205 | 0205 |  |
| 0206 | 0206 | 0206 |  |
| 0207 | 0207 | 0207 |  |
| 0208 | 0208 | 0208 |  |
| 0209 | 0209 | 0209 |  |
| 0210 | 0210 | 0210 |  |
| 0211 | 0211 | 0211 |  |
| 0212 | 0212 | 0212 |  |
| 0213 | 0213 | 0213 |  |
| 0214 | 0214 | 0214 |  |
| 0215 | 0215 | 0215 |  |
| 0216 | 0216 | 0216 |  |
| 0217 | 0217 | 0217 |  |
| 0218 | 0218 | 0218 |  |
| 0219 | 0219 | 0219 |  |
| 0220 | 0220 | 0220 |  |
| 0221 | 0221 | 0221 |  |
| 0222 | 0222 | 0222 |  |
| 0223 | 0223 | 0223 |  |
| 0224 | 0224 | 0224 |  |
| 0225 | 0225 | 0225 |  |
| 0226 | 0226 | 0226 |  |
| 0227 | 0227 | 0227 |  |
| 0228 | 0228 | 0228 |  |
| 0229 | 0229 | 0229 |  |
| 0230 | 0230 | 0230 |  |
| 0231 | 0231 | 0231 |  |
| 0232 | 0232 | 0232 |  |
| 0233 | 0233 | 0233 |  |
| 0234 | 0234 | 0234 |  |
| 0235 | 0235 | 0235 |  |
| 0236 | 0236 | 0236 |  |
| 0237 | 0237 | 0237 |  |
| 0238 | 0238 | 0238 |  |
| 0239 | 0239 | 0239 |  |
| 0240 | 0240 | 0240 |  |
| 0241 | 0241 | 0241 |  |
| 0242 | 0242 | 0242 |  |
| 0243 | 0243 | 0243 |  |
| 0244 | 0244 | 0244 |  |
| 0245 | 0245 | 0245 |  |
| 0246 | 0246 | 0246 |  |
| 0247 | 0247 | 0247 |  |
| 0248 | 0248 | 0248 |  |
| 0249 | 0249 | 0249 |  |
| 0250 | 0250 | 0250 |  |
| 0251 | 0251 | 0251 |  |
| 0252 | 0252 | 0252 |  |
| 0253 | 0253 | 0253 |  |
| 0254 | 0254 | 0254 |  |
| 0255 | 0255 | 0255 |  |
| 0256 | 0256 | 0256 |  |
| 0257 | 0257 | 0257 |  |
| 0258 | 0258 | 0258 |  |
| 0259 | 0259 | 0259 |  |
| 0260 | 0260 | 0260 |  |
| 0261 | 0261 | 0261 |  |
| 0262 | 0262 | 0262 |  |
| 0263 | 0263 | 0263 |  |
| 0264 | 0264 | 0264 |  |
| 0265 | 0265 | 0265 |  |
| 0266 | 0266 | 0266 |  |
| 0267 | 0267 | 0267 |  |
| 0268 | 0268 | 0268 |  |
| 0269 | 0269 | 0269 |  |
| 0270 | 0270 | 0270 |  |
| 0271 | 0271 | 0271 |  |
| 0272 | 0272 | 0272 |  |
| 0273 | 0273 | 0273 |  |
| 0274 | 0274 | 0274 |  |
| 0275 | 0275 | 0275 |  |
| 0276 | 0276 | 0276 |  |
| 0277 | 0277 | 0277 |  |
| 0278 | 0278 | 0278 |  |
| 0279 | 0279 | 0279 |  |
| 0280 | 0280 | 0280 |  |
| 0281 | 0281 | 0281 |  |
| 0282 | 0282 | 0282 |  |
| 0283 | 0283 | 0283 |  |
| 0284 | 0284 | 0284 |  |
| 0285 | 0285 | 0285 |  |
| 0286 | 0286 | 0286 |  |
| 0287 | 0287 | 0287 |  |
| 0288 | 0288 | 0288 |  |
| 0289 | 0289 | 0289 |  |
| 0290 | 0290 | 0290 |  |
| 0291 | 0291 | 0291 |  |
| 0292 | 0292 | 0292 |  |
| 0293 | 0293 | 0293 |  |
| 0294 | 0294 | 0294 |  |
| 0295 | 0295 | 0295 |  |
| 0296 | 0296 | 0296 |  |
| 0297 | 0297 | 0297 |  |
| 0298 | 0298 | 0298 |  |
| 0299 | 0299 | 0299 |  |
| 0300 | 0300 | 0300 |  |





















| Year | Revenue   | Operating Profit | Net Profit | Operating Profit Margin | Net Profit Margin | Operating Profit per Share | Net Profit per Share | Operating Profit per Share | Net Profit per Share | Operating Profit per Share | Net Profit per Share |
|------|-----------|------------------|------------|-------------------------|-------------------|----------------------------|----------------------|----------------------------|----------------------|----------------------------|----------------------|
| 2018 | 1,234,567 | 234,567          | 123,456    | 19.0%                   | 10.0%             | 1.23                       | 0.62                 | 1.23                       | 0.62                 | 1.23                       | 0.62                 |
| 2019 | 1,345,678 | 245,678          | 134,567    | 18.2%                   | 9.9%              | 1.34                       | 0.63                 | 1.34                       | 0.63                 | 1.34                       | 0.63                 |
| 2020 | 1,456,789 | 256,789          | 145,678    | 17.6%                   | 10.0%             | 1.45                       | 0.64                 | 1.45                       | 0.64                 | 1.45                       | 0.64                 |





































**Supplementary Table 12: Association of 10-day Activity Area from Eurofins Cell Line Panel with Sanger Mutations**

| genes     | p.value     | mutatedCellLines | median_WT | median_MT | dMedian |
|-----------|-------------|------------------|-----------|-----------|---------|
| ADC       | 0.000220695 | 141              | 3.55      | 4.29      | -0.74   |
| MEGF8     | 0.000671984 | 17               | 2.82      | 3.93      | -1.11   |
| COX4I2    | 0.000696504 | 6                | 2.155     | 3.81      | -1.655  |
| CAPN1     | 0.001074389 | 46               | 3.425     | 3.97      | -0.545  |
| INPPL1    | 0.001625844 | 17               | 2.85      | 3.89      | -1.04   |
| DIS3      | 0.001710364 | 30               | 3.34      | 3.95      | -0.61   |
| USP32     | 0.001834347 | 5                | 1.97      | 3.78      | -1.81   |
| ACIN1     | 0.002163315 | 23               | 3.25      | 3.945     | -0.695  |
| CCDC30    | 0.002401392 | 12               | 2.75      | 3.91      | -1.16   |
| TP53      | 0.002649119 | 49               | 3.47      | 3.96      | -0.49   |
| ANKRD52   | 0.002651865 | 24               | 3.245     | 3.92      | -0.675  |
| C20orf186 | 0.002731218 | 12               | 3.135     | 3.91      | -0.775  |
| CSPG4     | 0.002862413 | 16               | 3.365     | 3.92      | -0.555  |
| ATP1B2    | 0.002898047 | 4                | 1.525     | 3.75      | -2.225  |
| CNGA3     | 0.003008393 | 14               | 3.11      | 3.91      | -0.8    |
| TRH       | 0.003042461 | 5                | 1.84      | 3.78      | -1.94   |
| ANKRD26   | 0.003214683 | 30               | 3.34      | 3.94      | -0.6    |
| NCOR1     | 0.003466409 | 9                | 4.41      | 3.685     | 0.725   |
| CASKIN1   | 0.00370116  | 8                | 2.655     | 3.87      | -1.215  |
| ENPEP     | 0.003787563 | 13               | 2.36      | 3.84      | -1.48   |

**Supplementary Table 12: Association of 10-day gIC<sub>50</sub> Values from Eurofins Cell Line Panel with Sanger Mutations**

| genes     | p.value     | mutatedCellLines | median_WT | median_MT | dMedian |
|-----------|-------------|------------------|-----------|-----------|---------|
| MEGF8     | 0.000230006 | 17               | 602       | 149.5     | 452.5   |
| TP53      | 0.000314354 | 49               | 257       | 143       | 114     |
| C20orf186 | 0.00043074  | 12               | 336       | 152       | 184     |
| COX4I2    | 0.000501276 | 6                | 1626.5    | 154       | 1472.5  |
| CSPG4     | 0.000926814 | 16               | 308.5     | 152       | 156.5   |
| CNGA3     | 0.00100639  | 14               | 490.5     | 152       | 338.5   |
| CAPN1     | 0.00107443  | 46               | 270.5     | 147       | 123.5   |
| ACIN1     | 0.001297018 | 23               | 299       | 147       | 152     |
| ABCA8     | 0.001312394 | 36               | 258       | 147       | 111     |
| USP32     | 0.001332233 | 5                | 1170      | 155       | 1015    |
| LRRC4     | 0.00158154  | 20               | 365.5     | 152       | 213.5   |
| ATP8A2    | 0.001674299 | 34               | 276       | 152       | 124     |
| CASKIN1   | 0.001946257 | 8                | 760       | 153       | 607     |
| CA8       | 0.001978389 | 40               | 248.5     | 146       | 102.5   |
| BAIAP3    | 0.002440538 | 15               | 294       | 152       | 142     |
| EPHB1     | 0.002497451 | 16               | 660       | 153       | 507     |
| TRH       | 0.002505527 | 5                | 1170      | 155       | 1015    |
| ANKRD52   | 0.002529885 | 24               | 290       | 147       | 143     |
| BCLAF1    | 0.002663209 | 30               | 298       | 152       | 146     |
| ATP1B2    | 0.00289814  | 4                | 2305      | 156       | 2149    |

Summary Table 14. Public Release Categories of Expenditures (USA) - Report from Activity Area

| Activity Area            | Category                          | Sub-Category                  | Code     | Value      | Count   | Start Date | End Date   | Release Date | Release Type   | Release Status |
|--------------------------|-----------------------------------|-------------------------------|----------|------------|---------|------------|------------|--------------|----------------|----------------|
| ACQUISITION              | ACQUISITION OF GOODS AND SERVICES | ACQUISITION OF GOODS          | 01000000 | 1000000000 | 1000000 | 2000-01-01 | 2000-12-31 | 2000-01-01   | Public Release | Final          |
|                          | ACQUISITION OF GOODS AND SERVICES | ACQUISITION OF SERVICES       | 02000000 | 1000000000 | 1000000 | 2000-01-01 | 2000-12-31 | 2000-01-01   | Public Release | Final          |
|                          | ACQUISITION OF GOODS AND SERVICES | ACQUISITION OF INFORMATION    | 03000000 | 1000000000 | 1000000 | 2000-01-01 | 2000-12-31 | 2000-01-01   | Public Release | Final          |
|                          | ACQUISITION OF GOODS AND SERVICES | ACQUISITION OF EQUIPMENT      | 04000000 | 1000000000 | 1000000 | 2000-01-01 | 2000-12-31 | 2000-01-01   | Public Release | Final          |
|                          | ACQUISITION OF GOODS AND SERVICES | ACQUISITION OF SUPPLIES       | 05000000 | 1000000000 | 1000000 | 2000-01-01 | 2000-12-31 | 2000-01-01   | Public Release | Final          |
|                          | ACQUISITION OF GOODS AND SERVICES | ACQUISITION OF MATERIALS      | 06000000 | 1000000000 | 1000000 | 2000-01-01 | 2000-12-31 | 2000-01-01   | Public Release | Final          |
|                          | ACQUISITION OF GOODS AND SERVICES | ACQUISITION OF CONTRACTS      | 07000000 | 1000000000 | 1000000 | 2000-01-01 | 2000-12-31 | 2000-01-01   | Public Release | Final          |
|                          | ACQUISITION OF GOODS AND SERVICES | ACQUISITION OF TECHNOLOGY     | 08000000 | 1000000000 | 1000000 | 2000-01-01 | 2000-12-31 | 2000-01-01   | Public Release | Final          |
|                          | ACQUISITION OF GOODS AND SERVICES | ACQUISITION OF INFRASTRUCTURE | 09000000 | 1000000000 | 1000000 | 2000-01-01 | 2000-12-31 | 2000-01-01   | Public Release | Final          |
|                          | ACQUISITION OF GOODS AND SERVICES | ACQUISITION OF FACILITIES     | 10000000 | 1000000000 | 1000000 | 2000-01-01 | 2000-12-31 | 2000-01-01   | Public Release | Final          |
| OPERATIONS               | OPERATIONS AND MAINTENANCE        | OPERATIONS                    | 11000000 | 1000000000 | 1000000 | 2000-01-01 | 2000-12-31 | 2000-01-01   | Public Release | Final          |
|                          | OPERATIONS AND MAINTENANCE        | MAINTENANCE                   | 12000000 | 1000000000 | 1000000 | 2000-01-01 | 2000-12-31 | 2000-01-01   | Public Release | Final          |
|                          | OPERATIONS AND MAINTENANCE        | OPERATIONS AND MAINTENANCE    | 13000000 | 1000000000 | 1000000 | 2000-01-01 | 2000-12-31 | 2000-01-01   | Public Release | Final          |
|                          | OPERATIONS AND MAINTENANCE        | OPERATIONS AND MAINTENANCE    | 14000000 | 1000000000 | 1000000 | 2000-01-01 | 2000-12-31 | 2000-01-01   | Public Release | Final          |
|                          | OPERATIONS AND MAINTENANCE        | OPERATIONS AND MAINTENANCE    | 15000000 | 1000000000 | 1000000 | 2000-01-01 | 2000-12-31 | 2000-01-01   | Public Release | Final          |
|                          | OPERATIONS AND MAINTENANCE        | OPERATIONS AND MAINTENANCE    | 16000000 | 1000000000 | 1000000 | 2000-01-01 | 2000-12-31 | 2000-01-01   | Public Release | Final          |
|                          | OPERATIONS AND MAINTENANCE        | OPERATIONS AND MAINTENANCE    | 17000000 | 1000000000 | 1000000 | 2000-01-01 | 2000-12-31 | 2000-01-01   | Public Release | Final          |
|                          | OPERATIONS AND MAINTENANCE        | OPERATIONS AND MAINTENANCE    | 18000000 | 1000000000 | 1000000 | 2000-01-01 | 2000-12-31 | 2000-01-01   | Public Release | Final          |
|                          | OPERATIONS AND MAINTENANCE        | OPERATIONS AND MAINTENANCE    | 19000000 | 1000000000 | 1000000 | 2000-01-01 | 2000-12-31 | 2000-01-01   | Public Release | Final          |
|                          | OPERATIONS AND MAINTENANCE        | OPERATIONS AND MAINTENANCE    | 20000000 | 1000000000 | 1000000 | 2000-01-01 | 2000-12-31 | 2000-01-01   | Public Release | Final          |
| RESEARCH AND DEVELOPMENT | RESEARCH AND DEVELOPMENT          | RESEARCH AND DEVELOPMENT      | 21000000 | 1000000000 | 1000000 | 2000-01-01 | 2000-12-31 | 2000-01-01   | Public Release | Final          |
|                          | RESEARCH AND DEVELOPMENT          | RESEARCH AND DEVELOPMENT      | 22000000 | 1000000000 | 1000000 | 2000-01-01 | 2000-12-31 | 2000-01-01   | Public Release | Final          |
|                          | RESEARCH AND DEVELOPMENT          | RESEARCH AND DEVELOPMENT      | 23000000 | 1000000000 | 1000000 | 2000-01-01 | 2000-12-31 | 2000-01-01   | Public Release | Final          |
|                          | RESEARCH AND DEVELOPMENT          | RESEARCH AND DEVELOPMENT      | 24000000 | 1000000000 | 1000000 | 2000-01-01 | 2000-12-31 | 2000-01-01   | Public Release | Final          |
|                          | RESEARCH AND DEVELOPMENT          | RESEARCH AND DEVELOPMENT      | 25000000 | 1000000000 | 1000000 | 2000-01-01 | 2000-12-31 | 2000-01-01   | Public Release | Final          |
|                          | RESEARCH AND DEVELOPMENT          | RESEARCH AND DEVELOPMENT      | 26000000 | 1000000000 | 1000000 | 2000-01-01 | 2000-12-31 | 2000-01-01   | Public Release | Final          |
|                          | RESEARCH AND DEVELOPMENT          | RESEARCH AND DEVELOPMENT      | 27000000 | 1000000000 | 1000000 | 2000-01-01 | 2000-12-31 | 2000-01-01   | Public Release | Final          |
|                          | RESEARCH AND DEVELOPMENT          | RESEARCH AND DEVELOPMENT      | 28000000 | 1000000000 | 1000000 | 2000-01-01 | 2000-12-31 | 2000-01-01   | Public Release | Final          |
|                          | RESEARCH AND DEVELOPMENT          | RESEARCH AND DEVELOPMENT      | 29000000 | 1000000000 | 1000000 | 2000-01-01 | 2000-12-31 | 2000-01-01   | Public Release | Final          |
|                          | RESEARCH AND DEVELOPMENT          | RESEARCH AND DEVELOPMENT      | 30000000 | 1000000000 | 1000000 | 2000-01-01 | 2000-12-31 | 2000-01-01   | Public Release | Final          |
| ADMINISTRATIVE           | ADMINISTRATIVE                    | ADMINISTRATIVE                | 31000000 | 1000000000 | 1000000 | 2000-01-01 | 2000-12-31 | 2000-01-01   | Public Release | Final          |
|                          | ADMINISTRATIVE                    | ADMINISTRATIVE                | 32000000 | 1000000000 | 1000000 | 2000-01-01 | 2000-12-31 | 2000-01-01   | Public Release | Final          |
|                          | ADMINISTRATIVE                    | ADMINISTRATIVE                | 33000000 | 1000000000 | 1000000 | 2000-01-01 | 2000-12-31 | 2000-01-01   | Public Release | Final          |
|                          | ADMINISTRATIVE                    | ADMINISTRATIVE                | 34000000 | 1000000000 | 1000000 | 2000-01-01 | 2000-12-31 | 2000-01-01   | Public Release | Final          |
|                          | ADMINISTRATIVE                    | ADMINISTRATIVE                | 35000000 | 1000000000 | 1000000 | 2000-01-01 | 2000-12-31 | 2000-01-01   | Public Release | Final          |
|                          | ADMINISTRATIVE                    | ADMINISTRATIVE                | 36000000 | 1000000000 | 1000000 | 2000-01-01 | 2000-12-31 | 2000-01-01   | Public Release | Final          |
|                          | ADMINISTRATIVE                    | ADMINISTRATIVE                | 37000000 | 1000000000 | 1000000 | 2000-01-01 | 2000-12-31 | 2000-01-01   | Public Release | Final          |
|                          | ADMINISTRATIVE                    | ADMINISTRATIVE                | 38000000 | 1000000000 | 1000000 | 2000-01-01 | 2000-12-31 | 2000-01-01   | Public Release | Final          |
|                          | ADMINISTRATIVE                    | ADMINISTRATIVE                | 39000000 | 1000000000 | 1000000 | 2000-01-01 | 2000-12-31 | 2000-01-01   | Public Release | Final          |
|                          | ADMINISTRATIVE                    | ADMINISTRATIVE                | 40000000 | 1000000000 | 1000000 | 2000-01-01 | 2000-12-31 | 2000-01-01   | Public Release | Final          |



| DESCRIPTION             | UNIT | QUANTITY | UNIT PRICE | TOTAL PRICE | DATE     |
|-------------------------|------|----------|------------|-------------|----------|
| DESCRIPTION: [REDACTED] | 1    | 1        | 1.00       | 1.00        | 1/1/2018 |
| DESCRIPTION: [REDACTED] | 2    | 2        | 2.00       | 4.00        | 1/1/2018 |
| DESCRIPTION: [REDACTED] | 3    | 3        | 3.00       | 9.00        | 1/1/2018 |
| DESCRIPTION: [REDACTED] | 4    | 4        | 4.00       | 16.00       | 1/1/2018 |
| DESCRIPTION: [REDACTED] | 5    | 5        | 5.00       | 25.00       | 1/1/2018 |
| DESCRIPTION: [REDACTED] | 6    | 6        | 6.00       | 36.00       | 1/1/2018 |
| DESCRIPTION: [REDACTED] | 7    | 7        | 7.00       | 49.00       | 1/1/2018 |
| DESCRIPTION: [REDACTED] | 8    | 8        | 8.00       | 64.00       | 1/1/2018 |
| DESCRIPTION: [REDACTED] | 9    | 9        | 9.00       | 81.00       | 1/1/2018 |
| DESCRIPTION: [REDACTED] | 10   | 10       | 10.00      | 100.00      | 1/1/2018 |
| DESCRIPTION: [REDACTED] | 11   | 11       | 11.00      | 121.00      | 1/1/2018 |
| DESCRIPTION: [REDACTED] | 12   | 12       | 12.00      | 144.00      | 1/1/2018 |
| DESCRIPTION: [REDACTED] | 13   | 13       | 13.00      | 169.00      | 1/1/2018 |
| DESCRIPTION: [REDACTED] | 14   | 14       | 14.00      | 196.00      | 1/1/2018 |
| DESCRIPTION: [REDACTED] | 15   | 15       | 15.00      | 225.00      | 1/1/2018 |
| DESCRIPTION: [REDACTED] | 16   | 16       | 16.00      | 256.00      | 1/1/2018 |
| DESCRIPTION: [REDACTED] | 17   | 17       | 17.00      | 289.00      | 1/1/2018 |
| DESCRIPTION: [REDACTED] | 18   | 18       | 18.00      | 324.00      | 1/1/2018 |
| DESCRIPTION: [REDACTED] | 19   | 19       | 19.00      | 361.00      | 1/1/2018 |
| DESCRIPTION: [REDACTED] | 20   | 20       | 20.00      | 400.00      | 1/1/2018 |
| DESCRIPTION: [REDACTED] | 21   | 21       | 21.00      | 441.00      | 1/1/2018 |
| DESCRIPTION: [REDACTED] | 22   | 22       | 22.00      | 484.00      | 1/1/2018 |
| DESCRIPTION: [REDACTED] | 23   | 23       | 23.00      | 529.00      | 1/1/2018 |
| DESCRIPTION: [REDACTED] | 24   | 24       | 24.00      | 576.00      | 1/1/2018 |
| DESCRIPTION: [REDACTED] | 25   | 25       | 25.00      | 625.00      | 1/1/2018 |
| DESCRIPTION: [REDACTED] | 26   | 26       | 26.00      | 676.00      | 1/1/2018 |
| DESCRIPTION: [REDACTED] | 27   | 27       | 27.00      | 729.00      | 1/1/2018 |
| DESCRIPTION: [REDACTED] | 28   | 28       | 28.00      | 784.00      | 1/1/2018 |
| DESCRIPTION: [REDACTED] | 29   | 29       | 29.00      | 841.00      | 1/1/2018 |
| DESCRIPTION: [REDACTED] | 30   | 30       | 30.00      | 900.00      | 1/1/2018 |
| DESCRIPTION: [REDACTED] | 31   | 31       | 31.00      | 961.00      | 1/1/2018 |
| DESCRIPTION: [REDACTED] | 32   | 32       | 32.00      | 1024.00     | 1/1/2018 |
| DESCRIPTION: [REDACTED] | 33   | 33       | 33.00      | 1089.00     | 1/1/2018 |
| DESCRIPTION: [REDACTED] | 34   | 34       | 34.00      | 1156.00     | 1/1/2018 |
| DESCRIPTION: [REDACTED] | 35   | 35       | 35.00      | 1225.00     | 1/1/2018 |
| DESCRIPTION: [REDACTED] | 36   | 36       | 36.00      | 1296.00     | 1/1/2018 |
| DESCRIPTION: [REDACTED] | 37   | 37       | 37.00      | 1369.00     | 1/1/2018 |
| DESCRIPTION: [REDACTED] | 38   | 38       | 38.00      | 1444.00     | 1/1/2018 |
| DESCRIPTION: [REDACTED] | 39   | 39       | 39.00      | 1521.00     | 1/1/2018 |
| DESCRIPTION: [REDACTED] | 40   | 40       | 40.00      | 1600.00     | 1/1/2018 |
| DESCRIPTION: [REDACTED] | 41   | 41       | 41.00      | 1681.00     | 1/1/2018 |
| DESCRIPTION: [REDACTED] | 42   | 42       | 42.00      | 1764.00     | 1/1/2018 |
| DESCRIPTION: [REDACTED] | 43   | 43       | 43.00      | 1849.00     | 1/1/2018 |
| DESCRIPTION: [REDACTED] | 44   | 44       | 44.00      | 1936.00     | 1/1/2018 |
| DESCRIPTION: [REDACTED] | 45   | 45       | 45.00      | 2025.00     | 1/1/2018 |
| DESCRIPTION: [REDACTED] | 46   | 46       | 46.00      | 2116.00     | 1/1/2018 |
| DESCRIPTION: [REDACTED] | 47   | 47       | 47.00      | 2209.00     | 1/1/2018 |
| DESCRIPTION: [REDACTED] | 48   | 48       | 48.00      | 2304.00     | 1/1/2018 |
| DESCRIPTION: [REDACTED] | 49   | 49       | 49.00      | 2401.00     | 1/1/2018 |
| DESCRIPTION: [REDACTED] | 50   | 50       | 50.00      | 2500.00     | 1/1/2018 |
| DESCRIPTION: [REDACTED] | 51   | 51       | 51.00      | 2601.00     | 1/1/2018 |
| DESCRIPTION: [REDACTED] | 52   | 52       | 52.00      | 2704.00     | 1/1/2018 |
| DESCRIPTION: [REDACTED] | 53   | 53       | 53.00      | 2809.00     | 1/1/2018 |
| DESCRIPTION: [REDACTED] | 54   | 54       | 54.00      | 2916.00     | 1/1/2018 |
| DESCRIPTION: [REDACTED] | 55   | 55       | 55.00      | 3025.00     | 1/1/2018 |
| DESCRIPTION: [REDACTED] | 56   | 56       | 56.00      | 3136.00     | 1/1/2018 |
| DESCRIPTION: [REDACTED] | 57   | 57       | 57.00      | 3249.00     | 1/1/2018 |
| DESCRIPTION: [REDACTED] | 58   | 58       | 58.00      | 3364.00     | 1/1/2018 |
| DESCRIPTION: [REDACTED] | 59   | 59       | 59.00      | 3481.00     | 1/1/2018 |
| DESCRIPTION: [REDACTED] | 60   | 60       | 60.00      | 3600.00     | 1/1/2018 |
| DESCRIPTION: [REDACTED] | 61   | 61       | 61.00      | 3721.00     | 1/1/2018 |
| DESCRIPTION: [REDACTED] | 62   | 62       | 62.00      | 3844.00     | 1/1/2018 |
| DESCRIPTION: [REDACTED] | 63   | 63       | 63.00      | 3969.00     | 1/1/2018 |
| DESCRIPTION: [REDACTED] | 64   | 64       | 64.00      | 4096.00     | 1/1/2018 |
| DESCRIPTION: [REDACTED] | 65   | 65       | 65.00      | 4225.00     | 1/1/2018 |
| DESCRIPTION: [REDACTED] | 66   | 66       | 66.00      | 4356.00     | 1/1/2018 |
| DESCRIPTION: [REDACTED] | 67   | 67       | 67.00      | 4489.00     | 1/1/2018 |
| DESCRIPTION: [REDACTED] | 68   | 68       | 68.00      | 4624.00     | 1/1/2018 |
| DESCRIPTION: [REDACTED] | 69   | 69       | 69.00      | 4761.00     | 1/1/2018 |
| DESCRIPTION: [REDACTED] | 70   | 70       | 70.00      | 4900.00     | 1/1/2018 |
| DESCRIPTION: [REDACTED] | 71   | 71       | 71.00      | 5041.00     | 1/1/2018 |
| DESCRIPTION: [REDACTED] | 72   | 72       | 72.00      | 5184.00     | 1/1/2018 |
| DESCRIPTION: [REDACTED] | 73   | 73       | 73.00      | 5329.00     | 1/1/2018 |
| DESCRIPTION: [REDACTED] | 74   | 74       | 74.00      | 5476.00     | 1/1/2018 |
| DESCRIPTION: [REDACTED] | 75   | 75       | 75.00      | 5625.00     | 1/1/2018 |
| DESCRIPTION: [REDACTED] | 76   | 76       | 76.00      | 5776.00     | 1/1/2018 |
| DESCRIPTION: [REDACTED] | 77   | 77       | 77.00      | 5929.00     | 1/1/2018 |
| DESCRIPTION: [REDACTED] | 78   | 78       | 78.00      | 6084.00     | 1/1/2018 |
| DESCRIPTION: [REDACTED] | 79   | 79       | 79.00      | 6241.00     | 1/1/2018 |
| DESCRIPTION: [REDACTED] | 80   | 80       | 80.00      | 6400.00     | 1/1/2018 |
| DESCRIPTION: [REDACTED] | 81   | 81       | 81.00      | 6561.00     | 1/1/2018 |
| DESCRIPTION: [REDACTED] | 82   | 82       | 82.00      | 6724.00     | 1/1/2018 |
| DESCRIPTION: [REDACTED] | 83   | 83       | 83.00      | 6889.00     | 1/1/2018 |
| DESCRIPTION: [REDACTED] | 84   | 84       | 84.00      | 7056.00     | 1/1/2018 |
| DESCRIPTION: [REDACTED] | 85   | 85       | 85.00      | 7225.00     | 1/1/2018 |
| DESCRIPTION: [REDACTED] | 86   | 86       | 86.00      | 7396.00     | 1/1/2018 |
| DESCRIPTION: [REDACTED] | 87   | 87       | 87.00      | 7569.00     | 1/1/2018 |
| DESCRIPTION: [REDACTED] | 88   | 88       | 88.00      | 7744.00     | 1/1/2018 |
| DESCRIPTION: [REDACTED] | 89   | 89       | 89.00      | 7921.00     | 1/1/2018 |
| DESCRIPTION: [REDACTED] | 90   | 90       | 90.00      | 8100.00     | 1/1/2018 |
| DESCRIPTION: [REDACTED] | 91   | 91       | 91.00      | 8281.00     | 1/1/2018 |
| DESCRIPTION: [REDACTED] | 92   | 92       | 92.00      | 8464.00     | 1/1/2018 |
| DESCRIPTION: [REDACTED] | 93   | 93       | 93.00      | 8649.00     | 1/1/2018 |
| DESCRIPTION: [REDACTED] | 94   | 94       | 94.00      | 8836.00     | 1/1/2018 |
| DESCRIPTION: [REDACTED] | 95   | 95       | 95.00      | 9025.00     | 1/1/2018 |
| DESCRIPTION: [REDACTED] | 96   | 96       | 96.00      | 9216.00     | 1/1/2018 |
| DESCRIPTION: [REDACTED] | 97   | 97       | 97.00      | 9409.00     | 1/1/2018 |
| DESCRIPTION: [REDACTED] | 98   | 98       | 98.00      | 9604.00     | 1/1/2018 |
| DESCRIPTION: [REDACTED] | 99   | 99       | 99.00      | 9801.00     | 1/1/2018 |
| DESCRIPTION: [REDACTED] | 100  | 100      | 100.00     | 10000.00    | 1/1/2018 |



Supplemental Table S1. Non-coding Protein Catalog of Escherichia coli. Export from UniProt

| Accession | Gene | Protein | Length | MW | pI | Inst | CD | MD | MD2 | MD3 | MD4 | MD5 | MD6 | MD7 | MD8 | MD9 | MD10 | MD11 | MD12 | MD13 | MD14 | MD15 | MD16 | MD17 | MD18 | MD19 | MD20 | MD21 | MD22 | MD23 | MD24 | MD25 | MD26 | MD27 | MD28 | MD29 | MD30 | MD31 | MD32 | MD33 | MD34 | MD35 | MD36 | MD37 | MD38 | MD39 | MD40 | MD41 | MD42 | MD43 | MD44 | MD45 | MD46 | MD47 | MD48 | MD49 | MD50 | MD51 | MD52 | MD53 | MD54 | MD55 | MD56 | MD57 | MD58 | MD59 | MD60 | MD61 | MD62 | MD63 | MD64 | MD65 | MD66 | MD67 | MD68 | MD69 | MD70 | MD71 | MD72 | MD73 | MD74 | MD75 | MD76 | MD77 | MD78 | MD79 | MD80 | MD81 | MD82 | MD83 | MD84 | MD85 | MD86 | MD87 | MD88 | MD89 | MD90 | MD91 | MD92 | MD93 | MD94 | MD95 | MD96 | MD97 | MD98 | MD99 | MD100 | MD101 | MD102 | MD103 | MD104 | MD105 | MD106 | MD107 | MD108 | MD109 | MD110 | MD111 | MD112 | MD113 | MD114 | MD115 | MD116 | MD117 | MD118 | MD119 | MD120 | MD121 | MD122 | MD123 | MD124 | MD125 | MD126 | MD127 | MD128 | MD129 | MD130 | MD131 | MD132 | MD133 | MD134 | MD135 | MD136 | MD137 | MD138 | MD139 | MD140 | MD141 | MD142 | MD143 | MD144 | MD145 | MD146 | MD147 | MD148 | MD149 | MD150 | MD151 | MD152 | MD153 | MD154 | MD155 | MD156 | MD157 | MD158 | MD159 | MD160 | MD161 | MD162 | MD163 | MD164 | MD165 | MD166 | MD167 | MD168 | MD169 | MD170 | MD171 | MD172 | MD173 | MD174 | MD175 | MD176 | MD177 | MD178 | MD179 | MD180 | MD181 | MD182 | MD183 | MD184 | MD185 | MD186 | MD187 | MD188 | MD189 | MD190 | MD191 | MD192 | MD193 | MD194 | MD195 | MD196 | MD197 | MD198 | MD199 | MD200 | MD201 | MD202 | MD203 | MD204 | MD205 | MD206 | MD207 | MD208 | MD209 | MD210 | MD211 | MD212 | MD213 | MD214 | MD215 | MD216 | MD217 | MD218 | MD219 | MD220 | MD221 | MD222 | MD223 | MD224 | MD225 | MD226 | MD227 | MD228 | MD229 | MD230 | MD231 | MD232 | MD233 | MD234 | MD235 | MD236 | MD237 | MD238 | MD239 | MD240 | MD241 | MD242 | MD243 | MD244 | MD245 | MD246 | MD247 | MD248 | MD249 | MD250 | MD251 | MD252 | MD253 | MD254 | MD255 | MD256 | MD257 | MD258 | MD259 | MD260 | MD261 | MD262 | MD263 | MD264 | MD265 | MD266 | MD267 | MD268 | MD269 | MD270 | MD271 | MD272 | MD273 | MD274 | MD275 | MD276 | MD277 | MD278 | MD279 | MD280 | MD281 | MD282 | MD283 | MD284 | MD285 | MD286 | MD287 | MD288 | MD289 | MD290 | MD291 | MD292 | MD293 | MD294 | MD295 | MD296 | MD297 | MD298 | MD299 | MD300 | MD301 | MD302 | MD303 | MD304 | MD305 | MD306 | MD307 | MD308 | MD309 | MD310 | MD311 | MD312 | MD313 | MD314 | MD315 | MD316 | MD317 | MD318 | MD319 | MD320 | MD321 | MD322 | MD323 | MD324 | MD325 | MD326 | MD327 | MD328 | MD329 | MD330 | MD331 | MD332 | MD333 | MD334 | MD335 | MD336 | MD337 | MD338 | MD339 | MD340 | MD341 | MD342 | MD343 | MD344 | MD345 | MD346 | MD347 | MD348 | MD349 | MD350 | MD351 | MD352 | MD353 | MD354 | MD355 | MD356 | MD357 | MD358 | MD359 | MD360 | MD361 | MD362 | MD363 | MD364 | MD365 | MD366 | MD367 | MD368 | MD369 | MD370 | MD371 | MD372 | MD373 | MD374 | MD375 | MD376 | MD377 | MD378 | MD379 | MD380 | MD381 | MD382 | MD383 | MD384 | MD385 | MD386 | MD387 | MD388 | MD389 | MD390 | MD391 | MD392 | MD393 | MD394 | MD395 | MD396 | MD397 | MD398 | MD399 | MD400 | MD401 | MD402 | MD403 | MD404 | MD405 | MD406 | MD407 | MD408 | MD409 | MD410 | MD411 | MD412 | MD413 | MD414 | MD415 | MD416 | MD417 | MD418 | MD419 | MD420 | MD421 | MD422 | MD423 | MD424 | MD425 | MD426 | MD427 | MD428 | MD429 | MD430 | MD431 | MD432 | MD433 | MD434 | MD435 | MD436 | MD437 | MD438 | MD439 | MD440 | MD441 | MD442 | MD443 | MD444 | MD445 | MD446 | MD447 | MD448 | MD449 | MD450 | MD451 | MD452 | MD453 | MD454 | MD455 | MD456 | MD457 | MD458 | MD459 | MD460 | MD461 | MD462 | MD463 | MD464 | MD465 | MD466 | MD467 | MD468 | MD469 | MD470 | MD471 | MD472 | MD473 | MD474 | MD475 | MD476 | MD477 | MD478 | MD479 | MD480 | MD481 | MD482 | MD483 | MD484 | MD485 | MD486 | MD487 | MD488 | MD489 | MD490 | MD491 | MD492 | MD493 | MD494 | MD495 | MD496 | MD497 | MD498 | MD499 | MD500 | MD501 | MD502 | MD503 | MD504 | MD505 | MD506 | MD507 | MD508 | MD509 | MD510 | MD511 | MD512 | MD513 | MD514 | MD515 | MD516 | MD517 | MD518 | MD519 | MD520 | MD521 | MD522 | MD523 | MD524 | MD525 | MD526 | MD527 | MD528 | MD529 | MD530 | MD531 | MD532 | MD533 | MD534 | MD535 | MD536 | MD537 | MD538 | MD539 | MD540 | MD541 | MD542 | MD543 | MD544 | MD545 | MD546 | MD547 | MD548 | MD549 | MD550 | MD551 | MD552 | MD553 | MD554 | MD555 | MD556 | MD557 | MD558 | MD559 | MD560 | MD561 | MD562 | MD563 | MD564 | MD565 | MD566 | MD567 | MD568 | MD569 | MD570 | MD571 | MD572 | MD573 | MD574 | MD575 | MD576 | MD577 | MD578 | MD579 | MD580 | MD581 | MD582 | MD583 | MD584 | MD585 | MD586 | MD587 | MD588 | MD589 | MD590 | MD591 | MD592 | MD593 | MD594 | MD595 | MD596 | MD597 | MD598 | MD599 | MD600 | MD601 | MD602 | MD603 | MD604 | MD605 | MD606 | MD607 | MD608 | MD609 | MD610 | MD611 | MD612 | MD613 | MD614 | MD615 | MD616 | MD617 | MD618 | MD619 | MD620 | MD621 | MD622 | MD623 | MD624 | MD625 | MD626 | MD627 | MD628 | MD629 | MD630 | MD631 | MD632 | MD633 | MD634 | MD635 | MD636 | MD637 | MD638 | MD639 | MD640 | MD641 | MD642 | MD643 | MD644 | MD645 | MD646 | MD647 | MD648 | MD649 | MD650 | MD651 | MD652 | MD653 | MD654 | MD655 | MD656 | MD657 | MD658 | MD659 | MD660 | MD661 | MD662 | MD663 | MD664 | MD665 | MD666 | MD667 | MD668 | MD669 | MD670 | MD671 | MD672 | MD673 | MD674 | MD675 | MD676 | MD677 | MD678 | MD679 | MD680 | MD681 | MD682 | MD683 | MD684 | MD685 | MD686 | MD687 | MD688 | MD689 | MD690 | MD691 | MD692 | MD693 | MD694 | MD695 | MD696 | MD697 | MD698 | MD699 | MD700 | MD701 | MD702 | MD703 | MD704 | MD705 | MD706 | MD707 | MD708 | MD709 | MD710 | MD711 | MD712 | MD713 | MD714 | MD715 | MD716 | MD717 | MD718 | MD719 | MD720 | MD721 | MD722 | MD723 | MD724 | MD725 | MD726 | MD727 | MD728 | MD729 | MD730 | MD731 | MD732 | MD733 | MD734 | MD735 | MD736 | MD737 | MD738 | MD739 | MD740 | MD741 | MD742 | MD743 | MD744 | MD745 | MD746 | MD747 | MD748 | MD749 | MD750 | MD751 | MD752 | MD753 | MD754 | MD755 | MD756 | MD757 | MD758 | MD759 | MD760 | MD761 | MD762 | MD763 | MD764 | MD765 | MD766 | MD767 | MD768 | MD769 | MD770 | MD771 | MD772 | MD773 | MD774 | MD775 | MD776 | MD777 | MD778 | MD779 | MD780 | MD781 | MD782 | MD783 | MD784 | MD785 | MD786 | MD787 | MD788 | MD789 | MD790 | MD791 | MD792 | MD793 | MD794 | MD795 | MD796 | MD797 | MD798 | MD799 | MD800 | MD801 | MD802 | MD803 | MD804 | MD805 | MD806 | MD807 | MD808 | MD809 | MD810 | MD811 | MD812 | MD813 | MD814 | MD815 | MD816 | MD817 | MD818 | MD819 | MD820 | MD821 | MD822 | MD823 | MD824 | MD825 | MD826 | MD827 | MD828 | MD829 | MD830 | MD831 | MD832 | MD833 | MD834 | MD835 | MD836 | MD837 | MD838 | MD839 | MD840 | MD841 | MD842 | MD843 | MD844 | MD845 | MD846 | MD847 | MD848 | MD849 | MD850 | MD851 | MD852 | MD853 | MD854 | MD855 | MD856 | MD857 | MD858 | MD859 | MD860 | MD861 | MD862 | MD863 | MD864 | MD865 | MD866 | MD867 | MD868 | MD869 | MD870 | MD871 | MD872 | MD873 | MD874 | MD875 | MD876 | MD877 | MD878 | MD879 | MD880 | MD881 | MD882 | MD883 | MD884 | MD885 | MD886 | MD887 | MD888 | MD889 | MD890 | MD891 | MD892 | MD893 | MD894 | MD895 | MD896 | MD897 | MD898 | MD899 | MD900 | MD901 | MD902 | MD903 | MD904 | MD905 | MD906 | MD907 | MD908 | MD909 | MD910 | MD911 | MD912 | MD913 | MD914 | MD915 | MD916 | MD917 | MD918 | MD919 | MD920 | MD921 | MD922 | MD923 | MD924 | MD925 | MD926 | MD927 | MD928 | MD929 | MD930 | MD931 | MD932 | MD933 | MD934 | MD935 | MD936 | MD937 | MD938 | MD939 | MD940 | MD941 | MD942 | MD943 | MD944 | MD945 | MD946 | MD947 | MD948 | MD949 | MD950 | MD951 | MD952 | MD953 | MD954 | MD955 | MD956 | MD957 | MD958 | MD959 | MD960 | MD961 | MD962 | MD963 | MD964 | MD965 | MD966 | MD967 | MD968 | MD969 | MD970 | MD971 | MD972 | MD973 | MD974 | MD975 | MD976 | MD977 | MD978 | MD979 | MD980 | MD981 | MD982 | MD983 | MD984 | MD985 | MD986 | MD987 | MD988 | MD989 | MD990 | MD991 | MD992 | MD993 | MD994 | MD995 | MD996 | MD997 | MD998 | MD999 | MD1000 | MD1001 | MD1002 | MD1003 | MD1004 | MD1005 | MD1006 | MD1007 | MD1008 | MD1009 | MD1010 | MD1011 | MD1012 | MD1013 | MD1014 | MD1015 | MD1016 | MD1017 | MD1018 | MD1019 | MD1020 | MD1021 | MD1022 | MD1023 | MD1024 | MD1025 | MD1026 | MD1027 | MD1028 | MD1029 | MD1030 | MD1031 | MD1032 | MD1033 | MD1034 | MD1035 | MD1036 | MD1037 | MD1038 | MD1039 | MD1040 | MD1041 | MD1042 | MD1043 | MD1044 | MD1045 | MD1046 | MD1047 | MD1048 | MD1049 | MD1050 | MD1051 | MD1052 | MD1053 | MD1054 | MD1055 | MD1056 | MD1057 | MD1058 | MD1059 | MD1060 | MD1061 | MD1062 | MD1063 | MD1064 | MD1065 | MD1066 | MD1067 | MD1068 | MD1069 | MD1070 | MD1071 | MD1072 | MD1073 | MD1074 | MD1075 | MD1076 | MD1077 | MD1078 | MD1079 | MD1080 | MD1081 | MD1082 | MD1083 | MD1084 | MD1085 | MD1086 | MD1087 | MD1088 | MD1089 | MD1090 | MD1091 | MD1092 | MD1093 | MD1094 | MD1095 | MD1096 | MD1097 | MD1098 | MD1099 | MD1100 | MD1101 | MD1102 | MD1103 | MD1104 | MD1105 | MD1106 | MD1107 | MD1108 | MD1109 | MD1110 | MD1111 | MD1112 | MD1113 | MD1114 | MD1115 | MD1116 | MD1117 | MD1118 | MD1119 | MD1120 | MD1121 | MD1122 | MD1123 | MD1124 | MD1125 | MD1126 | MD1127 | MD1128 | MD1129 | MD1130 | MD1131 | MD1132 | MD1133 | MD1134 | MD1135 | MD1136 | MD1137 | MD1138 | MD1139 | MD1140 | MD1141 | MD1142 | MD1143 | MD1144 | MD1145 | MD1146 | MD1147 | MD1148 | MD1149 | MD1150 | MD1151 | MD1152 | MD1153 | MD1154 | MD1155 | MD1156 | MD1157 | MD1158 | MD1159 | MD1160 | MD1161 | MD1162 | MD1163 | MD1164 | MD1165 | MD1166 | MD1167 | MD1168 | MD1169 | MD1170 | MD1171 | MD1172 | MD1173 | MD1174 | MD1175 | MD1176 | MD1177 | MD1178 | MD1179 | MD1180 | MD1181 | MD1182 | MD1183 | MD1184 | MD1185 | MD1186 | MD1187 | MD1188 | MD1189 | MD1190 | MD1191 | MD1192 | MD1193 | MD1194 | MD1195 | MD1196 | MD1197 | MD1198 | MD1199 | MD1200 | MD1201 | MD1202 | MD1203 | MD1204 | MD1205 | MD1206 | MD1207 | MD1208 | MD1209 | MD1210 | MD1211 | MD1212 | MD1213 | MD1214 | MD1215 | MD1216 | MD1217 | MD1218 | MD1219 | MD1220 | MD1221 | MD1222 | MD1223 | MD1224 | MD1225 | MD1226 | MD1227 | MD1228 | MD1229 | MD1230 | MD1231 | MD1232 | MD1233 | MD1234 | MD1235 | MD1236 | MD1237 | MD1238 | MD1239 | MD1240 | MD1241 | MD1242 | MD1243 | MD1244 | MD1245 | MD1246 | MD1247 | MD1248 | MD1249 | MD1250 | MD1251 | MD1252 | MD1253 | MD1254 | MD1255 | MD1256 | MD1257 | MD1258 | MD1259 | MD1260 | MD1261 | MD1262 | MD1263 | MD1264 | MD1265 | MD1266 | MD1267 | MD1268 | MD1269 | MD1270 | MD1271 | MD1272 | MD1273 | MD1274 | MD1275 | MD1276 | MD1277 | MD1278 | MD1279 | MD1280 | MD1281 | MD1282 | MD1283 | MD1284 | MD1285 | MD1286 | MD1287 | MD1288 | MD1289 | MD1290 | MD1291 | MD1292 | MD1293 | MD1294 | MD1295 | MD1296 | MD1297 | MD1298 | MD1299 | MD1300 | MD1301 | MD1302 | MD1303 | MD1304 | MD1305 | MD1306 | MD1307 | MD1308 | MD1309 | MD1310 | MD1311 | MD1312 | MD1313 | MD1314 | MD1315 | MD1316 | MD1317 | MD1318 | MD1319 | MD1320 | MD1321 | MD1322 | MD1323 | MD1324 | MD1325 | MD1326 | MD1327 | MD1328 | MD1329 | MD1330 | MD1331 | MD1332 | MD1333 | MD1334 | MD1335 |  |
|-----------|------|---------|--------|----|----|------|----|----|-----|-----|-----|-----|-----|-----|-----|-----|------|------|------|------|------|------|------|------|------|------|------|------|------|------|------|------|------|------|------|------|------|------|------|------|------|------|------|------|------|------|------|------|------|------|------|------|------|------|------|------|------|------|------|------|------|------|------|------|------|------|------|------|------|------|------|------|------|------|------|------|------|------|------|------|------|------|------|------|------|------|------|------|------|------|------|------|------|------|------|------|------|------|------|------|------|------|------|------|------|------|-------|-------|-------|-------|-------|-------|-------|-------|-------|-------|-------|-------|-------|-------|-------|-------|-------|-------|-------|-------|-------|-------|-------|-------|-------|-------|-------|-------|-------|-------|-------|-------|-------|-------|-------|-------|-------|-------|-------|-------|-------|-------|-------|-------|-------|-------|-------|-------|-------|-------|-------|-------|-------|-------|-------|-------|-------|-------|-------|-------|-------|-------|-------|-------|-------|-------|-------|-------|-------|-------|-------|-------|-------|-------|-------|-------|-------|-------|-------|-------|-------|-------|-------|-------|-------|-------|-------|-------|-------|-------|-------|-------|-------|-------|-------|-------|-------|-------|-------|-------|-------|-------|-------|-------|-------|-------|-------|-------|-------|-------|-------|-------|-------|-------|-------|-------|-------|-------|-------|-------|-------|-------|-------|-------|-------|-------|-------|-------|-------|-------|-------|-------|-------|-------|-------|-------|-------|-------|-------|-------|-------|-------|-------|-------|-------|-------|-------|-------|-------|-------|-------|-------|-------|-------|-------|-------|-------|-------|-------|-------|-------|-------|-------|-------|-------|-------|-------|-------|-------|-------|-------|-------|-------|-------|-------|-------|-------|-------|-------|-------|-------|-------|-------|-------|-------|-------|-------|-------|-------|-------|-------|-------|-------|-------|-------|-------|-------|-------|-------|-------|-------|-------|-------|-------|-------|-------|-------|-------|-------|-------|-------|-------|-------|-------|-------|-------|-------|-------|-------|-------|-------|-------|-------|-------|-------|-------|-------|-------|-------|-------|-------|-------|-------|-------|-------|-------|-------|-------|-------|-------|-------|-------|-------|-------|-------|-------|-------|-------|-------|-------|-------|-------|-------|-------|-------|-------|-------|-------|-------|-------|-------|-------|-------|-------|-------|-------|-------|-------|-------|-------|-------|-------|-------|-------|-------|-------|-------|-------|-------|-------|-------|-------|-------|-------|-------|-------|-------|-------|-------|-------|-------|-------|-------|-------|-------|-------|-------|-------|-------|-------|-------|-------|-------|-------|-------|-------|-------|-------|-------|-------|-------|-------|-------|-------|-------|-------|-------|-------|-------|-------|-------|-------|-------|-------|-------|-------|-------|-------|-------|-------|-------|-------|-------|-------|-------|-------|-------|-------|-------|-------|-------|-------|-------|-------|-------|-------|-------|-------|-------|-------|-------|-------|-------|-------|-------|-------|-------|-------|-------|-------|-------|-------|-------|-------|-------|-------|-------|-------|-------|-------|-------|-------|-------|-------|-------|-------|-------|-------|-------|-------|-------|-------|-------|-------|-------|-------|-------|-------|-------|-------|-------|-------|-------|-------|-------|-------|-------|-------|-------|-------|-------|-------|-------|-------|-------|-------|-------|-------|-------|-------|-------|-------|-------|-------|-------|-------|-------|-------|-------|-------|-------|-------|-------|-------|-------|-------|-------|-------|-------|-------|-------|-------|-------|-------|-------|-------|-------|-------|-------|-------|-------|-------|-------|-------|-------|-------|-------|-------|-------|-------|-------|-------|-------|-------|-------|-------|-------|-------|-------|-------|-------|-------|-------|-------|-------|-------|-------|-------|-------|-------|-------|-------|-------|-------|-------|-------|-------|-------|-------|-------|-------|-------|-------|-------|-------|-------|-------|-------|-------|-------|-------|-------|-------|-------|-------|-------|-------|-------|-------|-------|-------|-------|-------|-------|-------|-------|-------|-------|-------|-------|-------|-------|-------|-------|-------|-------|-------|-------|-------|-------|-------|-------|-------|-------|-------|-------|-------|-------|-------|-------|-------|-------|-------|-------|-------|-------|-------|-------|-------|-------|-------|-------|-------|-------|-------|-------|-------|-------|-------|-------|-------|-------|-------|-------|-------|-------|-------|-------|-------|-------|-------|-------|-------|-------|-------|-------|-------|-------|-------|-------|-------|-------|-------|-------|-------|-------|-------|-------|-------|-------|-------|-------|-------|-------|-------|-------|-------|-------|-------|-------|-------|-------|-------|-------|-------|-------|-------|-------|-------|-------|-------|-------|-------|-------|-------|-------|-------|-------|-------|-------|-------|-------|-------|-------|-------|-------|-------|-------|-------|-------|-------|-------|-------|-------|-------|-------|-------|-------|-------|-------|-------|-------|-------|-------|-------|-------|-------|-------|-------|-------|-------|-------|-------|-------|-------|-------|-------|-------|-------|-------|-------|-------|-------|-------|-------|-------|-------|-------|-------|-------|-------|-------|-------|-------|-------|-------|-------|-------|-------|-------|-------|-------|-------|-------|-------|-------|-------|-------|-------|-------|-------|-------|-------|-------|-------|-------|-------|-------|-------|-------|-------|-------|-------|-------|-------|-------|-------|-------|-------|-------|-------|-------|-------|-------|-------|-------|-------|-------|-------|-------|-------|-------|-------|-------|-------|-------|-------|-------|-------|-------|-------|-------|-------|-------|-------|-------|-------|-------|-------|-------|-------|-------|-------|-------|-------|-------|-------|-------|-------|-------|-------|-------|-------|-------|-------|-------|-------|-------|-------|-------|-------|-------|-------|-------|-------|-------|-------|-------|-------|-------|-------|-------|-------|-------|-------|-------|-------|-------|-------|-------|-------|-------|-------|-------|-------|-------|-------|-------|-------|-------|-------|-------|-------|-------|-------|-------|-------|-------|-------|-------|-------|-------|-------|-------|-------|-------|-------|-------|-------|-------|-------|-------|-------|-------|-------|-------|-------|-------|-------|-------|-------|-------|-------|-------|-------|-------|-------|-------|-------|-------|-------|-------|-------|-------|-------|-------|-------|-------|-------|-------|-------|-------|-------|-------|-------|-------|-------|-------|-------|-------|-------|-------|-------|-------|-------|-------|-------|-------|-------|-------|-------|-------|-------|-------|-------|-------|-------|-------|-------|-------|-------|-------|-------|-------|-------|-------|-------|-------|-------|-------|-------|-------|-------|-------|-------|-------|-------|-------|-------|-------|-------|-------|-------|-------|-------|-------|-------|-------|-------|-------|-------|-------|-------|-------|-------|-------|-------|-------|-------|-------|--------|--------|--------|--------|--------|--------|--------|--------|--------|--------|--------|--------|--------|--------|--------|--------|--------|--------|--------|--------|--------|--------|--------|--------|--------|--------|--------|--------|--------|--------|--------|--------|--------|--------|--------|--------|--------|--------|--------|--------|--------|--------|--------|--------|--------|--------|--------|--------|--------|--------|--------|--------|--------|--------|--------|--------|--------|--------|--------|--------|--------|--------|--------|--------|--------|--------|--------|--------|--------|--------|--------|--------|--------|--------|--------|--------|--------|--------|--------|--------|--------|--------|--------|--------|--------|--------|--------|--------|--------|--------|--------|--------|--------|--------|--------|--------|--------|--------|--------|--------|--------|--------|--------|--------|--------|--------|--------|--------|--------|--------|--------|--------|--------|--------|--------|--------|--------|--------|--------|--------|--------|--------|--------|--------|--------|--------|--------|--------|--------|--------|--------|--------|--------|--------|--------|--------|--------|--------|--------|--------|--------|--------|--------|--------|--------|--------|--------|--------|--------|--------|--------|--------|--------|--------|--------|--------|--------|--------|--------|--------|--------|--------|--------|--------|--------|--------|--------|--------|--------|--------|--------|--------|--------|--------|--------|--------|--------|--------|--------|--------|--------|--------|--------|--------|--------|--------|--------|--------|--------|--------|--------|--------|--------|--------|--------|--------|--------|--------|--------|--------|--------|--------|--------|--------|--------|--------|--------|--------|--------|--------|--------|--------|--------|--------|--------|--------|--------|--------|--------|--------|--------|--------|--------|--------|--------|--------|--------|--------|--------|--------|--------|--------|--------|--------|--------|--------|--------|--------|--------|--------|--------|--------|--------|--------|--------|--------|--------|--------|--------|--------|--------|--------|--------|--------|--------|--------|--------|--------|--------|--------|--------|--------|--------|--------|--------|--------|--------|--------|--------|--------|--------|--------|--------|--------|--------|--------|--------|--------|--------|--------|--------|--------|--------|--------|--------|--------|--------|--------|--------|--------|--------|--------|--------|--------|--------|--------|--------|--------|--------|--------|--------|--------|--------|--------|--------|--------|--------|--------|--------|--------|--------|--------|--------|--------|--------|--------|--------|--------|--------|--------|--------|--------|--------|--------|--------|--------|--------|--------|--------|--------|--------|--------|--------|--------|--------|--------|--|
|-----------|------|---------|--------|----|----|------|----|----|-----|-----|-----|-----|-----|-----|-----|-----|------|------|------|------|------|------|------|------|------|------|------|------|------|------|------|------|------|------|------|------|------|------|------|------|------|------|------|------|------|------|------|------|------|------|------|------|------|------|------|------|------|------|------|------|------|------|------|------|------|------|------|------|------|------|------|------|------|------|------|------|------|------|------|------|------|------|------|------|------|------|------|------|------|------|------|------|------|------|------|------|------|------|------|------|------|------|------|------|------|------|-------|-------|-------|-------|-------|-------|-------|-------|-------|-------|-------|-------|-------|-------|-------|-------|-------|-------|-------|-------|-------|-------|-------|-------|-------|-------|-------|-------|-------|-------|-------|-------|-------|-------|-------|-------|-------|-------|-------|-------|-------|-------|-------|-------|-------|-------|-------|-------|-------|-------|-------|-------|-------|-------|-------|-------|-------|-------|-------|-------|-------|-------|-------|-------|-------|-------|-------|-------|-------|-------|-------|-------|-------|-------|-------|-------|-------|-------|-------|-------|-------|-------|-------|-------|-------|-------|-------|-------|-------|-------|-------|-------|-------|-------|-------|-------|-------|-------|-------|-------|-------|-------|-------|-------|-------|-------|-------|-------|-------|-------|-------|-------|-------|-------|-------|-------|-------|-------|-------|-------|-------|-------|-------|-------|-------|-------|-------|-------|-------|-------|-------|-------|-------|-------|-------|-------|-------|-------|-------|-------|-------|-------|-------|-------|-------|-------|-------|-------|-------|-------|-------|-------|-------|-------|-------|-------|-------|-------|-------|-------|-------|-------|-------|-------|-------|-------|-------|-------|-------|-------|-------|-------|-------|-------|-------|-------|-------|-------|-------|-------|-------|-------|-------|-------|-------|-------|-------|-------|-------|-------|-------|-------|-------|-------|-------|-------|-------|-------|-------|-------|-------|-------|-------|-------|-------|-------|-------|-------|-------|-------|-------|-------|-------|-------|-------|-------|-------|-------|-------|-------|-------|-------|-------|-------|-------|-------|-------|-------|-------|-------|-------|-------|-------|-------|-------|-------|-------|-------|-------|-------|-------|-------|-------|-------|-------|-------|-------|-------|-------|-------|-------|-------|-------|-------|-------|-------|-------|-------|-------|-------|-------|-------|-------|-------|-------|-------|-------|-------|-------|-------|-------|-------|-------|-------|-------|-------|-------|-------|-------|-------|-------|-------|-------|-------|-------|-------|-------|-------|-------|-------|-------|-------|-------|-------|-------|-------|-------|-------|-------|-------|-------|-------|-------|-------|-------|-------|-------|-------|-------|-------|-------|-------|-------|-------|-------|-------|-------|-------|-------|-------|-------|-------|-------|-------|-------|-------|-------|-------|-------|-------|-------|-------|-------|-------|-------|-------|-------|-------|-------|-------|-------|-------|-------|-------|-------|-------|-------|-------|-------|-------|-------|-------|-------|-------|-------|-------|-------|-------|-------|-------|-------|-------|-------|-------|-------|-------|-------|-------|-------|-------|-------|-------|-------|-------|-------|-------|-------|-------|-------|-------|-------|-------|-------|-------|-------|-------|-------|-------|-------|-------|-------|-------|-------|-------|-------|-------|-------|-------|-------|-------|-------|-------|-------|-------|-------|-------|-------|-------|-------|-------|-------|-------|-------|-------|-------|-------|-------|-------|-------|-------|-------|-------|-------|-------|-------|-------|-------|-------|-------|-------|-------|-------|-------|-------|-------|-------|-------|-------|-------|-------|-------|-------|-------|-------|-------|-------|-------|-------|-------|-------|-------|-------|-------|-------|-------|-------|-------|-------|-------|-------|-------|-------|-------|-------|-------|-------|-------|-------|-------|-------|-------|-------|-------|-------|-------|-------|-------|-------|-------|-------|-------|-------|-------|-------|-------|-------|-------|-------|-------|-------|-------|-------|-------|-------|-------|-------|-------|-------|-------|-------|-------|-------|-------|-------|-------|-------|-------|-------|-------|-------|-------|-------|-------|-------|-------|-------|-------|-------|-------|-------|-------|-------|-------|-------|-------|-------|-------|-------|-------|-------|-------|-------|-------|-------|-------|-------|-------|-------|-------|-------|-------|-------|-------|-------|-------|-------|-------|-------|-------|-------|-------|-------|-------|-------|-------|-------|-------|-------|-------|-------|-------|-------|-------|-------|-------|-------|-------|-------|-------|-------|-------|-------|-------|-------|-------|-------|-------|-------|-------|-------|-------|-------|-------|-------|-------|-------|-------|-------|-------|-------|-------|-------|-------|-------|-------|-------|-------|-------|-------|-------|-------|-------|-------|-------|-------|-------|-------|-------|-------|-------|-------|-------|-------|-------|-------|-------|-------|-------|-------|-------|-------|-------|-------|-------|-------|-------|-------|-------|-------|-------|-------|-------|-------|-------|-------|-------|-------|-------|-------|-------|-------|-------|-------|-------|-------|-------|-------|-------|-------|-------|-------|-------|-------|-------|-------|-------|-------|-------|-------|-------|-------|-------|-------|-------|-------|-------|-------|-------|-------|-------|-------|-------|-------|-------|-------|-------|-------|-------|-------|-------|-------|-------|-------|-------|-------|-------|-------|-------|-------|-------|-------|-------|-------|-------|-------|-------|-------|-------|-------|-------|-------|-------|-------|-------|-------|-------|-------|-------|-------|-------|-------|-------|-------|-------|-------|-------|-------|-------|-------|-------|-------|-------|-------|-------|-------|-------|-------|-------|-------|-------|-------|-------|-------|-------|-------|-------|-------|-------|-------|-------|-------|-------|-------|-------|-------|-------|-------|-------|-------|-------|-------|-------|-------|-------|-------|-------|-------|-------|-------|-------|-------|-------|-------|-------|-------|-------|-------|-------|-------|-------|-------|-------|-------|-------|-------|-------|-------|-------|-------|-------|-------|-------|-------|-------|-------|-------|-------|-------|-------|-------|-------|-------|-------|-------|-------|-------|-------|-------|-------|-------|-------|-------|-------|-------|-------|-------|-------|-------|-------|-------|-------|-------|-------|-------|-------|-------|-------|-------|-------|-------|-------|-------|-------|-------|-------|-------|-------|-------|-------|-------|-------|-------|-------|-------|-------|-------|-------|-------|-------|-------|-------|-------|-------|-------|-------|-------|-------|-------|-------|-------|-------|-------|-------|-------|-------|-------|-------|-------|-------|-------|-------|-------|-------|-------|-------|-------|-------|-------|-------|-------|-------|-------|-------|-------|-------|-------|-------|-------|-------|-------|-------|-------|-------|-------|-------|-------|-------|-------|-------|-------|-------|-------|-------|-------|-------|-------|-------|-------|-------|-------|--------|--------|--------|--------|--------|--------|--------|--------|--------|--------|--------|--------|--------|--------|--------|--------|--------|--------|--------|--------|--------|--------|--------|--------|--------|--------|--------|--------|--------|--------|--------|--------|--------|--------|--------|--------|--------|--------|--------|--------|--------|--------|--------|--------|--------|--------|--------|--------|--------|--------|--------|--------|--------|--------|--------|--------|--------|--------|--------|--------|--------|--------|--------|--------|--------|--------|--------|--------|--------|--------|--------|--------|--------|--------|--------|--------|--------|--------|--------|--------|--------|--------|--------|--------|--------|--------|--------|--------|--------|--------|--------|--------|--------|--------|--------|--------|--------|--------|--------|--------|--------|--------|--------|--------|--------|--------|--------|--------|--------|--------|--------|--------|--------|--------|--------|--------|--------|--------|--------|--------|--------|--------|--------|--------|--------|--------|--------|--------|--------|--------|--------|--------|--------|--------|--------|--------|--------|--------|--------|--------|--------|--------|--------|--------|--------|--------|--------|--------|--------|--------|--------|--------|--------|--------|--------|--------|--------|--------|--------|--------|--------|--------|--------|--------|--------|--------|--------|--------|--------|--------|--------|--------|--------|--------|--------|--------|--------|--------|--------|--------|--------|--------|--------|--------|--------|--------|--------|--------|--------|--------|--------|--------|--------|--------|--------|--------|--------|--------|--------|--------|--------|--------|--------|--------|--------|--------|--------|--------|--------|--------|--------|--------|--------|--------|--------|--------|--------|--------|--------|--------|--------|--------|--------|--------|--------|--------|--------|--------|--------|--------|--------|--------|--------|--------|--------|--------|--------|--------|--------|--------|--------|--------|--------|--------|--------|--------|--------|--------|--------|--------|--------|--------|--------|--------|--------|--------|--------|--------|--------|--------|--------|--------|--------|--------|--------|--------|--------|--------|--------|--------|--------|--------|--------|--------|--------|--------|--------|--------|--------|--------|--------|--------|--------|--------|--------|--------|--------|--------|--------|--------|--------|--------|--------|--------|--------|--------|--------|--------|--------|--------|--------|--------|--------|--------|--------|--------|--------|--------|--------|--------|--------|--------|--------|--------|--------|--------|--------|--------|--------|--------|--------|--------|--------|--------|--------|--------|--------|--------|--------|--------|--------|--------|--------|--------|--------|--------|--|





**Supplementary Table 16: Materials for Western Blotting and Gene Expression Studies**

## Primary Antibodies

| Target  | Application                        | Supplier                  | Catalog # |
|---------|------------------------------------|---------------------------|-----------|
| SDMA    | Western, ELISA, Immunofluorescence | Cell Signaling Technology | 13222S    |
| SmD3    | ELISA, Immunofluorescence          | Abgent                    | AP12451A  |
| MDM4    | Western                            | Abcam                     | ab49993   |
| p53     | Western                            | Santa Cruz Biotechnology  | sc-126    |
| p21     | Western                            | Sigma                     | P1484     |
| p21     | Western                            | Cell Signaling Technology | 2946      |
| H3      | Western                            | Cell Signaling Technology | 9715      |
| Tubulin | Western                            | Sigma                     | T9026     |
| Actin   | Western                            | Thermo                    | PA1-46296 |
| p53     | Immunohistochemistry               | Thermo                    | MA5-16387 |

## Gene Expression Reagents

| Target        | Application  | Supplier  | Catalog #     |
|---------------|--------------|-----------|---------------|
| HDMX, forward | PCR          | Biosearch | SS294168-01   |
| HDMX, reverse | PCR          | Biosearch | SS294169-01   |
| GAPDH         | PCR          | Qiagen    | PPH00150F     |
| CCL4          | Taqman Assay | Thermo    | Hs00605740_g1 |
| CCL3          | Taqman Assay | Thermo    | Hs04194942_s1 |
| GADD45A       | Taqman Assay | Thermo    | Hs00169255_m1 |
| SESN1         | Taqman Assay | Thermo    | Hs00902787_m1 |
| ACTA2         | Taqman Assay | Thermo    | Hs00426835_g1 |
| MDM2          | Taqman Assay | Thermo    | Hs01066930_m1 |
| PHLDA3        | Taqman Assay | Thermo    | Hs00385313_m1 |
| TRIM22        | Taqman Assay | Thermo    | Hs01001179_m1 |
| EGR2          | Taqman Assay | Thermo    | Hs00166165_m1 |
| CDKN1A        | Taqman Assay | Thermo    | Hs00355782_m1 |
| BAX           | Taqman Assay | Thermo    | Hs00180269_m1 |
| Actin         | Taqman Assay | Thermo    | 401846        |
| GAPDH         | Taqman Assay | Thermo    | 402869        |

## Supplemental Materials and Methods

### Compounds

Two PRMT5 inhibitors, GSK3203591 (tool compound, MW = 380.483) and GSK3326595 (clinical compound, MW = 452.549), were synthesized by GSK Medicinal Chemistry. These compounds are used interchangeably due to their similar profiles.

### Biochemistry

#### Biochemical Studies

PRMT5/MEP50 was purified as described previously (1). In summary, Flag-PRMT5 (2-end) was coexpressed with his-MEP50 (2-end) in a baculovirus expression system and purified via NiNTA affinity. Flag-hu-PRMT9-2-845 (NP\_612373) prep 3 was expressed in a baculovirus expression system and purified via anti-flag M2 chromatography and Superdex 75 gel filtration chromatography. The following reagents and consumables were purchased from commercial vendors: (1) [3H]-SAM, Adenosyl-L-Methionine, S-[methyl-3H]-, 1mCi (37MBq) PerkinElmer NET155H001MC, (2) SAM, Adenosyl-L-Methionine, New England BioLabs #B9003S, (3) Histone H4 1-21 peptide (SGRGKGGKGLGKGGAKRHRKV) AnaSpec, Inc. USA. Catalog #62499, (4) Histone H2A 1-20 peptide (SGRGKQGGKARAKAKTRSSRGG-K(Biotin)) AnaSpec, Inc. USA. Catalog #64842-1, (5) 96 well reaction plate, Costar #3884, (6) MSPH filter plate, Millipore MSPHNXB50, (7) MicroScint-20, PerkinElmer #6013621, (8) Arginine Binding Ysi SPA beads, PerkinElmer RPNQ0101. The following peptide substrates were custom ordered from 21<sup>st</sup> Century Biochemicals, USA.: (1) FUBP1 349-369 peptide (NPGGPGPGGRGRGRGQGNWNM-amide), (2) HNRNPH1 211-231 peptide (DRPGAGRGYNSIGRGAGFERM-amide), (3) SmD3 88-106 peptide (MKNKNQGSAGRGKAAILKAQ-amide), and (4) SAP145 496-516 peptide (NSVPVPRHWCFKRKYLQGKRG –amide). All other reagents were of commercial grade.

Data analysis converted cpm output to % inhibition. IC<sub>50</sub> values were determined using GraFit software by fitting the experimental % inhibition data to a 3-parameter model, where the upper limit was fixed at 100. To determine  $K^{app}$ , IC<sub>50</sub> data was fit to the Cheng-Prusoff equation for competitive or uncompetitive inhibition.

Formula to yield % inhibition:

$$\% \text{ inhibition} = \left(1 - \frac{cpm_{compd} - cpm_{min}}{cpm_{max} - cpm_{min}}\right) \times 100$$

Where  $cpm$  = counts per minute,  $compd$  = signal in treated well,  $max$  = the positive signal control and  $min$  = the negative signal control

Formula to yield IC<sub>50</sub> values:

$$\% \text{ inhibition} = \text{Bottom} + \frac{\text{Top} - \text{Bottom}}{(1 + (IC_{50}/[I])^n)}$$

Where  $Top$  = inhibited value fixed to 100%,  $Bottom$  = uninhibited value,  $[I]$  = concentration of inhibitor,  $IC_{50}$  = half maximal inhibitory concentration and  $n$  = Hill Slope. The equation assumes that  $y$  (% inhibition) increases with increasing  $x$  ( $[I]$ ).

Formula for Cheng-Prusoff:

$$\text{If Competitive; } K_i^{app} = \frac{IC_{50}}{1 + ([S]/K_m^{app})}$$

$$\text{If Uncompetitive; } K_i^{app} = \frac{IC_{50}}{1 + (K_m^{app}/[S])}$$

Where  $K_i^{app}$  is the binding affinity of the inhibitor,  $IC_{50}$  is half maximal inhibitory concentration,  $[S]$  is the substrate concentration and  $K_m^{app}$  is the concentration of the substrate at which the enzyme activity is half maximal

### Mode of Inhibition Studies

GSK3326595 (typically 11-point, 3-fold serial dilution spanning 0.09-5102 nM) was prestamped at 500 nL per well in the reaction plate. Titrating concentrations of SAM comprising of a mixture of  $^3\text{H}$ -SAM and unlabeled SAM including a constant concentration of peptide (12  $\mu\text{L}$  per well, at 2X in assay buffer) was added to the compound plate. The product inhibitor SAH (24  $\mu\text{L}$  per well of 1 mM stock) was added to select wells for use as the minimum signal control. Enzyme mix (12  $\mu\text{L}$  per well, 2X in assay buffer) was added to initiate the reaction. Final assay conditions consisted of 6 nM PRMT5/MEP50, 40 nM peptide, 50-8000 nM SAM in 50 mM Tris (pH 8.5), 0.002% Tween-20, 4 mM  $\text{MgCl}_2$  and 1 mM DTT. Reactions were incubated for 30 min at room temperature and quenched with 24  $\mu\text{L}$  per well of 1 mM SAH. Arginine Binding Ysi SPA beads at 3 mg/mL in 0.2M  $\text{NH}_4\text{CO}_3$  (24  $\mu\text{L}$  per well) were added, plates were sealed and equilibrated for  $\geq 30$  min, centrifuged and then read on a MicroBeta (PerkinElmer) following a  $\geq 200$  min delay to measure the amount of tritium incorporated into the peptide substrate, reported as counts per minute (CPM). The peptide substrate (positive charge) is captured on the bead (negative charge) through charge/charge interaction. Once in proximity to the radiolabel, the bead scintillant is stimulated and emits light. Above methods were used for the peptide mode of inhibition studies expect final assay conditions were 6 nM PRMT5/MEP50, 1.6-1000 nM peptide, 1000 nM SAM (250 nM  $^3\text{H}$ -SAM and 750 nM unlabeled SAM) in 50 mM Tris (pH 8.5), 0.002% Tween-20, 4 mM  $\text{MgCl}_2$  and 1 mM DTT.

### Analysis of Slow Binding Inhibition

GSK3326595 (typically 11-point, 3-fold serial dilution spanning 0.09-5102 nM) was prestamped at 500 nL per well in the reaction plate. SAM comprising of a mixture of  $^3\text{H}$ -SAM and unlabeled SAM (6  $\mu\text{L}$  per well, 4X in assay buffer) followed by

PRMT5/MEP50 (12  $\mu$ L per well, 2X in assay buffer) were added to the compound plate and incubated for 3-60 min. The product inhibitor SAH (24  $\mu$ L per well of 1 mM stock) was added to select wells for use as the minimum signal control. Peptide mix (6  $\mu$ L per well, 4X in assay buffer) was added to initiate the reaction. For 0 min preincubation, SAM and peptide were added to the compound plate followed by enzyme addition to initiate the reaction. Final assay conditions consisted of 0.8 or 4 nM PRMT5/MEP50, 50 nM peptide ( $K_m^{app}$ ), 1000 nM SAM (260 nM  $^3$ H-SAM and 740 nM unlabeled SAM,  $K_m^{app}$ ) in 50 mM Tris (pH 8.5), 0.002% Tween-20, 4 mM MgCl<sub>2</sub> and 1 mM DTT. Reactions were incubated for 30 min at room temperature and quenched with 24  $\mu$ L per well of 1 mM SAH. Arginine Binding Ysi SPA beads were added to the plate and processed as listed above.

#### *IC<sub>50</sub> determinations with Enzyme: SAM: Inhibitor preincubation*

GSK3326595 (typically 11-point, 3-fold serial dilution spanning 0.09-5102 nM) was prestamped at 500 nL per well in the reaction plate. SAM comprising of a mixture of  $^3$ H-SAM and unlabeled SAM (6  $\mu$ L per well, 4X in assay buffer) followed by PRMT5/MEP50 (12  $\mu$ L per well, 2X in assay buffer) were added to the compound plate and incubated for 60 min. The product inhibitor SAH (24  $\mu$ L per well of 1 mM stock) was added to select wells for use as the minimum signal control. Peptide mix (6  $\mu$ L per well, 4X in assay buffer) was added to initiate the reaction. Reactions were incubated for 30 min at room temperature and quenched with 24  $\mu$ L per well of 1 mM SAH. Arginine Binding Ysi SPA beads were added to the plate and processed as listed above. Final assay conditions consisted of 2-6 nM PRMT5/MEP50, 1000 nM SAM (260 nM  $^3$ H-SAM and 740 nM unlabeled SAM,  $K_m^{app}$ ) in 50 mM Tris (pH 8.5), 0.002% Tween-20, 4 mM MgCl<sub>2</sub> and 1 mM DTT plus peptide. Assay was substituted with desired peptide substrate tested at respective  $K_m^{app}$  value, H4 1-21 (50 nM), H2A 1-20 (150 nM), SmD3 88-106 (230 nM), FUBPH1 349-369 (230 nM) or HNRNPH1 211-231 (230 nM).

Above methods were used for the PRMT9 inhibition studies expect final assay conditions were 3 nM PRMT9, 150 nM SAP145 peptide ( $K_m^{app}$ ), 3000 nM SAM (510 nM  $^3$ H-SAM and 3000 nM unlabeled SAM,  $K_m^{app}$ ) in 25 mM Tris (pH 8), 0.002% Tween-20, 4 mM MgCl<sub>2</sub>, 100 mM NaCl and 1 mM DTT. Following quench, a 30  $\mu$ L volume of the reaction was transferred to a premoistened MSPH filter plate followed by the addition of 150  $\mu$ L of 0.2M NH<sub>4</sub>HCO<sub>3</sub>. The peptide substrate (positive charge) is captured on the filter plate (negative charge) through charge/charge interaction. After an incubation time of 15 min, the plate was washed 4 times with 150  $\mu$ L per well of 0.2M NH<sub>4</sub>HCO<sub>3</sub> and dried in an oven at 50°C. MicroScint-20 (35  $\mu$ L per well) was added, plates were sealed and equilibrated for  $\geq$  30 min and then read on a TopCount (PerkinElmer) to measure the amount of tritium incorporated into the peptide substrate, reported as counts per minute (CPM).

#### *Methyltransferase cross-screening panel*

Cross-screening against a panel of 19 protein methyltransferase enzymes (shown in Figure 1D) was done according to general procedures as previously described (2).

Final assay conditions varied slightly depending on the enzyme tested. In summary, GSK3326595 (spanning 2-40,000 nM) was incubated for 30 min with enzyme in assay buffer. Substrate mix comprising of assay buffer with either nucleosome or biotin labeled peptide (10-330 nM) and between 8-2500 nM SAM (mixture of <sup>3</sup>H-SAM and unlabeled) was added to initiate the reaction. The final substrate concentration was fixed at the  $K_m^{app}$  for each substrate (SAM, peptide or nucleosome) and was specific to the enzyme tested. Reactions were incubated for between 90-120 min at room temperature and quenched with unlabeled SAM. The minimum signal control contained the product inhibitor SAH (50-2000  $\mu$ M). After an incubation time of 1 hour to overnight, plates were washed with 0.1% Tween-20. Incorporation of radioactivity into substrate was measured by capturing substrate on a PerkinElmer Flashplate, and detecting on a PerkinElmer TopCount.

## **MethylScan<sup>®</sup>**

MethylScan technology (Cell Signaling Technology) was used to evaluate the cellular targets of PRMT5 in the Z-138 cell line. Methylated peptide was immuno-affinity purified (IAP) with a symmetric dimethyl arginine antibody (Cell Signaling, # 13222S clone D2C3D6). Tandem mass spectrometry (LC-MS/MS) was used to analyze enriched symmetrically dimethylated peptides for qualitative sequence and site identification. Finally, quantitative analysis of methylated peptide fold-change allowed for comparison between DMSO and GSK3203591-treated samples. More negative fold change values correspond to the greatest effect.

## **Cellular proliferation assays**

### 6-day, 384-well single agent proliferation assays (GSK)

Cells were plated at an optimized seeding density in 384-well format using the Hamilton STARlet automated liquid handling platform and were incubated for 24 hours. On assay Day 0, cells were treated in duplicate with a 20-point, two-fold dilution series of GSK3203591 or GSK3326595 ( $\leq 29\mu$ M top dose) and  $\leq 0.15\%$  DMSO, and incubated for 6 days. Cell growth was evaluated on Day 0 and Day 6 by measuring luminescence signal generated by addition of CellTiter-Glo reagent (Promega G8462).

Data were fit with a sigmoidal 4-point, 4 parameter, one-site dose response model using Assay Client software, where the following equation was used to generate a concentration response curve:

$$y (fit) = A + \frac{(B - A)}{1 + (C/x)^D}$$

Individual curves were QC checked for outlier data points, cell growth (population doubling  $\geq 1.5$ ), and proper curve fitting. Growth IC50 (gIC50) values correspond to the concentration intersecting the mid-point of the growth window (between DMSO and T0 values) and represent the concentration of compound required to inhibit the total cell growth observed during the assay by half. Growth IC100 (gIC100) values correspond to



the concentration at which 100% growth inhibition is achieved, based on the growth window. Net cell growth/death values were calculated by subtracting the T0 value (100%) from the Ymin value on the curve, and are a measure of net population cell growth or death. This value reflects the difference between the number of cells seeded at Day 0 (100%) and the number of cells remaining at the endpoint of the assay, such that negative values correspond to net cell death while positive values correspond to net cell growth. dEC50 values correspond to the concentration at which 50% net cell death is observed.

#### 10-day, 384-well single agent proliferation assays (Eurofins panel)

Cells were grown in RPMI-1640, 10% FBS, 2 mM L-alanyl-L-Glutamine, 1mM Na Pyruvate or a special medium in a humidified atmosphere of 5% CO<sub>2</sub> at 37°C. Cells were seeded into 384-well plates and incubated in a humidified atmosphere of 5% CO<sub>2</sub> at 37°C. Compounds were added 24 hours post cell seeding. At the same time, a time zero untreated cell plate was generated. At 168 hours post cell seeding, the cell plates were briefly spun, and media was removed and replaced with fresh growth media. The plates were then re-dosed with the test compound. After a 240 hour incubation period, cells were fixed and stained with fluorescent nuclear dye to allow visualization of nuclei. Compounds were serially diluted 3.16-fold and assayed over 10 concentrations in a final assay concentration of 0.1% DMSO from the highest test concentration specified in the sample information chapter. Automated fluorescence microscopy was carried out using a Molecular Devices ImageXpress Micro XL high-content imager, and images were collected with a 4X objective.

16-bit TIFF images were acquired and analyzed with MetaXpress 5.1.0.41 software. EC50 and IC50 values were calculated using nonlinear regression to fit data to a sigmoidal 4-point, 4 parameter, one-site dose response model, where:

$$y (fit) = A + \frac{(B - A)}{1 + (C/x)^D}$$

Curve-fitting, EC<sub>50</sub> / IC<sub>50</sub> calculations and report generation was performed using a custom data reduction engine and MathIQ based software (AIM). The cell proliferation assay uses a cell image based analysis technique where cells are fixed and stained with fluorescent nuclear dye to visualize nuclei.

Cell proliferation is measured by the signal intensity of the incorporated nuclear dye. The cell proliferation assay output is referred to as the relative cell count. To determine the cell proliferation end point, the cell proliferation data output is transformed to percent of control (POC) using the following formula:

$$POC = \left( \frac{\text{relative cell count (compound wells)}}{\text{relative cell count (vehicle wells)}} \right) * 100$$

Relative cell count  $IC_{50}$  is the test compound concentration at 50% of maximal possible response. A relative cell count  $EC_{50}$  is the test compound concentration at the curve inflection point or half the effective response (parameter C of the fitted curve solution).  $GI_{50}$  is the concentration needed to reduce the observed growth by half. This is the concentration that inhibits the growth midway between untreated cells and the number of cells seeded in the well (Time zero value), and will be reported in this manuscript as  $gIC_{50}$  for consistency with GSK data. Activity area is an estimate of the integrated area above the curve. Activity area values generally range from 0-10, where a value of zero indicates no inhibition of proliferation at all concentrations, and a value of 10 indicates complete inhibition of proliferation at all concentrations. In rare instances, values  $<0$  or  $>10$  may be observed. In these instances, values  $<0$  should be considered as equivalent to 0, whereas values  $>10$  should be considered equivalent to 10.

Time zero non-treated plate is used to determine number of doublings in 72 hour assay period: Number of doublings in 72 hours =  $\text{Log}_2[\text{Cell number (72 hrs end point)} / \text{Cell number (time zero)}]$ .

#### 10-day, 96-well single agent proliferation assays (GSK)

10-day growth-death assays were also performed on SW48 (Sigma CLL1008-1VL) and SW48 p53<sup>-/-</sup> (Sigma CLL1013-1VL) cell lines to evaluate the effect of p53 knockout on proliferation. An extended time course was used in these experiments because Western blotting for SDMA suggested effective target engagement would require longer than 6-days (data not shown). Optimal cell seeding was determined by monitoring proliferation over a range of seeding densities in 96-well format and identifying the seeding density at which cells grow logarithmically at 3, 6, and 10-day time points. The PerkinElmer Zephyr workstation was used to seed cells in 96-well plates at the optimal seeding density in 100 $\mu$ L of culture media supplemented with 10% FBS. Seven plates were prepared per cell line (duplicate plates for Day 0, 3, and 6 reads) and incubated overnight at 37°C in 5% CO<sub>2</sub>. The following day, cells were treated in duplicate on the Zephyr workstation with a 20-point, two-fold dilution series of GSK3326595 (26 $\mu$ M top dose) and  $\leq 0.15\%$  DMSO. Plates were incubated for the indicated number of days at the conditions described above. Cell growth was measured using CellTiter-Glo reagent (Promega G8462) and luminescence signal was detected using an Envision microplate reader. A plate of untreated cells was read at the time of compound addition to determine the T=0 value representing the starting number of cells. Data were analyzed using XLfit at Graphpad Prism software.

### **SDMA Analysis**

#### SDMA ELISA

*In vitro* treated lymphoma cells and frozen tumors powder samples were resuspended in RIPA buffer containing protease/phosphatase inhibitor cocktail (Cell Signaling

#5872S). Tumor powder was homogenized with a hand-held polytron (IKA T10 basic Ultra Turrax) on ice, followed by sonication with a hand-held polytron (IKA T10 basic Ultra Turrax) at setting 6, on ice (20 seconds/twice). Cell lysates were spun at 12,000 rpm for 10 minutes at 4°C and cleared lysate was transferred to a new tube.

Cell lysates were diluted with PBS Carbonate-Bicarbonate buffer pH 9.6 (Sigma, #C3041) and added to black high binding plates (Nunc Maxisorp #437111). A titration (serial 2-fold dilution from 960 to 2 ng/well) of vehicle treated control lysate was used to evaluate linear range. Lysate was incubated for 2 hours at room temperature. Lysate was removed and plates were washed 4 times with 200uL wash solution (PBST, Cell Signaling, #9809S), followed by a 2 hour block step with PBST with 1% bovine serum albumen (BSA; Alfa Aesar, #J61089). Prior to addition of the primary antibody, the plates are washed as previously described.

The primary antibodies, SDMA (Cell Signaling, # 13222S clone D2C3D6, lot #2) and SMD3 (Abgent, #AP12451A), were diluted with 1% BSA buffer, 100uL added/well. Plates were incubated overnight with rocking at 4°C. Primary antibody was removed, plates were washed as previously described, and secondary HRP-conjugated anti-rabbit antibody (Cell Signaling Technology #7074) was added and incubated at room temperature for one hour. Following the final wash step, plates were tapped briefly on paper towels to remove any residual wash buffer and 100uL of Luminata Forte substrate (Millipore #WBKUF0500) was added to each well. Plates were incubated for 15 minutes with rocking and read on an Envision plate reader using a 96 well luminescence protocol. SDMA levels were normalized to SMD3 values and IC<sub>50</sub> values were determined using a 4 parameter curve fit.

### SDMA Imaging Assay

The SDMA imaging assay was used to evaluate the potency of GSK3326595 in breast cancer cell lines. Cells were plated at 2,000 cells per well in an optical bottom 96-well cell culture plate (Nunc 1256670) and allowed to adhere overnight. Cells were treated for 72 hours with a 10-point 5-fold dilution series (dose range = 0.8 pM – 1500 nM), fixed with 4% formaldehyde (ThermoScientific 28908), permeabilized, and blocked with 10% goat serum (Gibco 16210) in immunofluorescence (IF) buffer (130mM NaCl, 7mM Na<sub>2</sub>HPO<sub>4</sub>, 3.5 mM NaH<sub>2</sub>PO<sub>4</sub>, 7.7mM NaN<sub>3</sub>, 0.1% BSA, 0.2% Triton X, 0.05% Tween 20) prior to overnight incubation with antibodies specific for SDMA (Cell Signaling Technology # 13138BF, lot D2C3D6) and SMD3 (Abgent # AP12451A, lot 150508HF). Following washes with IF buffer, cells were further incubated with fluorescent secondary antibodies (Invitrogen Oregon Green Anti-rabbit #11038) and DAPI nuclear staining (Invitrogen #D357) prior to quantification of nuclear SDMA and SMD3 levels via Molecular Devices MetaExpress high-content fluorescent imager using a 10x objective to image a minimum of 4 sites per well. Image analysis was performed with ImageExpress software using Multiwavelength scoring to quantitate each fluorescent signal (FITC, and DAPI) in each well. SDMA levels were then normalized to SMD3 levels and IC<sub>50</sub>, IC<sub>90</sub>, EC<sub>50</sub> and EC<sub>90</sub> values were determined using a 4 parameter curve fit.

## **Cell Cycle and Cell Death Analysis**

### Cell cycle analysis

Cell cycle phase distribution was examined by flow cytometry of propidium iodide stained nuclei. Cells were treated with PRMT5 inhibitor or DMSO for the indicated period of time, depending on experiment. Pellets were processed using the BD Biosciences CycleTest kit according to the manufacturer's instructions and were evaluated using a FACSCalibur flow cytometer. FlowJo software was used to determine the cell cycle distribution.

### Annexin V and 7AAD Staining

Early apoptosis and cell death were evaluated using Annexin V staining (APC Annexin V, BD Biosciences, #550475) and 7-AAD (BD Bioscience #559925) and performed as recommended by the manufacturer. Cells were treated with PRMT5 inhibitor for 3 or 6 days or Camptothecin, a positive control, for 12 hours. Compound treated cells were washed with cold PBS, and cell pellets were resuspended in 1X binding buffer (10X binding buffer, BD Bioscience #556454) to a concentration of a million cells per ml. Stain was added to 100 ul cells in duplicate, and incubated for 15 minutes at room temperature followed by further 5 fold dilution with 1 X binding buffer. Fluorescent events were collected on a FACSCalibur Becton Dickonson (BD Biosciences) and data were analyzed using FlowJo (Treestar, Ashland) to discriminate live cells (Annexin V (-) 7-AAD (-)) from apoptotic cells (AnnexinV (+)7-AAD (-)) from dead cells Annexin V (+/-) 7-AAD (+). Individual control samples unstained, and stained with each fluorochrome independently are used to establish spectral overlap. Compensation was calculated post data collection within the software.

## **RNA-Seq**

### RNA-Seq sample preparation and differential expression

Z-138, SU-DHL-6, JVM-2, SU-DHL-5, MAVER-1, MINO, SU-DHL-4, and REC-1 cell lines were treated with either DMSO (control) or 200 nM GSK3326595. Cells were collected for RNA-seq analysis post 3 and 6 days. Z-138, GRANTA-519, and DOHH-2 cell lines were treated with either DMSO (control) or 1000 nM GSK3203591. Cells were collected for RNA-seq analysis post 2 and 4 days.

RNA was extracted from cell pellets with Trizol using Qiagen's RNeasy Mini Kit. Libraries were prepared using Illumina TruSeq Stranded Total RNA with Ribo-Zero Gold Library Prep and sequenced on Illumina HiSeq2500 to 60-80 million PE 2 x 101bp. RNA-seq fastq files were aligned to human hg38 with the gencode GRCh38.v23 annotation using a 2-pass STAR-2.5.2b (3) and then ribosomal and mitochondrial alignments were removed. Differential gene expression was calculated using Cufflinks2 suite considering genes with q-value less than 0.05, and a minimum expression >1

FPKM, and a minimum 2-fold change in expression as significant (4). Individual gene expressions in FPKM values were taken from the normalized differential values from the cuffdiff output files.

#### Gene pathway analysis

Gene symbols were submitted for MsigDB comparing against the CP, CP:BIOCARTA, CP:KEGG, CP:REACTOME, and Hallmark gene sets (Broad), as well as using the R package clusterProfiler and ReactomePA (5,6), reporting only the most significant gene set.

#### Alternative splicing analysis

To calculate global splicing events, alignment files from STAR were used as input for rMATS and run using default parameters with the `-novelSS` flag to identify novel splicing events. Events were considered significant with  $FDR < 0.01$ ,  $SD < 0.2$ , junction coverage  $> 10$  for both the spliced in and excluded junctions, and  $-0.2 < \text{IncLevelDifference} < 0.2$  for alternative splicing events from “ JunctionCountOnly” output files (6).

### **MDM4 splicing and p53 pathway analysis**

#### MDM4 splicing and p53 pathway analysis

##### *RNA isolation and RT-PCR for MDM4 splicing analysis*

RNA isolated from cell pellets was converted to cDNA using ABI High Capacity Reverse Transcription Reagents (4274966). Reverse transcription reactions were incubated in a thermal cycler for 10 minutes at 25°C, 2 hours at 37°C, and 5 minutes at 85°C. Master mix was prepared using Thermo DreamTaq Master Mix (K1081), 20uM HDMX forward primer (Biosearch Technologies, catalog # SS294168-01), 20uM HDMX reverse primer (Biosearch Technologies, catalog #SS294169-01), and nuclease-free water. A control master mix was prepared similarly using GAPDH primers (Qiagen PPH00150F). PCR reactions were prepared by combining 10uL of 9-fold diluted cDNA with 40uL of master mix and were incubated on a thermal cycler as follows: 1 cycle of 95°C for 5 minutes; 26 cycles of 95°C for 40 seconds, 58°C for 30 seconds, and 72°C for 40 seconds; then 1 cycle of 72°C for 4 minutes. Reaction products were separated using agarose ethidium bromide gel electrophoresis and visualized using a Bio-Rad VersaDoc Model 5000 imaging system. Images were captured using Bio-Rad Quantity One software at various exposure times to optimize signal strength and avoid saturation. Images are shown using an inverted color scheme for easier visualization.

##### *Western Blotting for p53 pathway analysis*

Gel samples were prepared by combining whole cell lysates with NuPAGE LDS Sample Buffer (NP007), NuPAGE Sample Reducing Agent (NP009), and RIPA buffer (Sigma R0278). Samples were loaded onto NuPAGE Novex 4-12% Bis-Tris protein gels and run in MES SDS (NP002) buffer at 150V until bands were well resolved. Proteins were transferred onto nitrocellulose with an iBlot and probed membranes were developed

using a LiCOR Odyssey scanner. Blots were scanned at various exposures to optimize signal strength and avoid saturation. Antibodies against p53 (Santa Cruz sc-126), p21 (Sigma P1484 or Cell Signaling 2946), SDMA (Cell Signaling 13138BF, clone #D2C3D6), MDM4 (Abcam ab49993), H3 (Cell Signaling 9715), tubulin (Sigma T9026), and actin (Thermo PA1-46296) were used to probe protein expression levels in Western blotting experiments.

## **Sensitivity Correlations**

A 10-point dose response growth assay was performed 10 days post GSK3203591 treatment in a panel of 240 cell lines representing various tumor types. Activity area was calculated for each cell line and used as the metric for sensitivity.

Whole exome-seq mutation data for 1000 cell lines was downloaded from the Genomics of Drug Sensitivity in Cancer (Sanger Institute's <http://www.cancerrxgene.org>) and used to calculate each gene's mutant versus wild type activity area using a Wilcoxon rank sum test from the 185 common cell lines. Waterfall plots of cell lines sorted by increasing activity area with mutant cell lines indicated in green were generated and p-value calculated using R.

CCLF microarray RMA normalized expression values across 1019 cell lines were used to correlate each gene's expression profile using a Pearson correlation with activity area in the 178 common cell lines. Genes were sorted by Pearson correlation and the sorted gene list submitted to GSEA pre-ranked analysis interrogating hallmark gene sets, canonical pathways, BioCarta, Kegg, and Reactome gene sets (Broad Institute). Increasing false discovery rates (FDR) are plotted against normalized enrichment scores of the gene sets. An example gene of the lowest p-value from each of "Reactome\_mRNA\_Splicing", "Reactome\_nonsense\_mediated\_decay\_by\_the\_exon\_junction\_complex", and "PID\_p53\_regulation\_pathway" gene sets is plotted comparing cell lines sorted by activity area. Each of the CLNS1A, RIOK1, and the ratio of the two's gene expression, is plotted comparing cell lines sorted by activity area.

A heatmap of all genes within the Reactome\_mRNA\_splicing gene set (the lowest p-value) in the 20 most resistant and sensitive cell lines hierarchical clustered by euclidean distance.

MTAP gene level copy data was downloaded from the Genomics of Drug Sensitivity in Cancer for 1000 cell lines and the 185 cell lines in common had a Wilcoxon rank sum test performed to test the difference in the mean of sensitivities between MTAP homozygous deleted cell lines and those with at least one functional copy.

## **Lentiviruses**

Lentiviruses were engineered to express MDM4-FL (generated in-house), EGFP (generated in-house), p53-targeting shRNA (Santa Cruz, sc-29435-V), or a scrambled non-targeting shRNA (Santa Cruz, sc-108080). Lentiviral particles were added at a multiplicity of transduction (MOT) of 20 to Z-138 cells that had been seeded into 6-well dishes, then polybrene was added to a final concentration of 50ug/mL. The dishes were centrifuged at 1,000xg for 90 minutes at 37°C. Cell pellets were collected, supernatant discarded, and pellets were resuspended in culture media. Each pellet was re-seeded into a fresh 6-well dish and then incubated at 37°C and 5% CO<sub>2</sub> for 48h. Puromycin selection was used to generate and maintain stable cell lines. An anti-MDM4 antibody (Abcam ab49993) was used to evaluate the success of the overexpression via Western blot. Proliferation assays were conducted in 384-well format at 3- and 6-day time points with these cell lines as described earlier.

## **Gene expression**

### *Gene expression analysis in Z-138 cell line*

Z-138 cells were obtained from ATCC, (CRL-3001) and maintained in RPMI-1640 supplemented with 10% horse serum. Cells were incubated at 37°C with 5% CO<sub>2</sub> and split once a week. Z-138 cells were treated with increasing doses of GSK3326595 in 96-well cell culture plates for 2 and 4 days, RNA was isolated using TurboCapture 96 Kit (Qiagen # 72251). Reverse transcription was performed with High Capacity Reverse Transcription reagents (ABI #4374966), followed by qPCR (ABI Taqman Fast Advanced Master mix, cat # 4444557) analysis on ABI ViiA7 real-time PCR machine using the Fast TaqMan Comparative Ct ( $2^{-\Delta\Delta Ct}$ ) method (7). Taqman assays targeted the genes CCL4 (Hs00605740\_g1), CCL3 (Hs04194942\_s1), GADD45A (Hs00169255\_m1), SESN1 (Hs00902787\_m1), ACTA2 (Hs00426835\_g1), MDM2 (Hs01066930\_m1), PHLDA3 (Hs00385313\_m1), TRIM22 (Hs01001179\_m1), EGR2 (Hs00166165\_m1), CDKN1A (Hs00355782\_m1), BAX (Hs00180269\_m1), actin (Thermo 401846), and GAPDH (Thermo 402869).

## **Xenograft studies**

### *Z-138 efficacy and PD study*

The Z-138 (human B Cell Non-Hodgkin's Lymphoma) cells from ATCC (ATCC No: CRL-3001, Lot No: 57634322) were maintained *in vitro* as a suspension culture in IMDM medium supplemented with 10% heat inactivated horse serum, 100 U/ml penicillin and 100 µg/ml streptomycin at 37 °C in atmosphere of 5% CO<sub>2</sub> in air. The tumor cells were routinely subcultured twice weekly with fresh medium. Cells growing in an exponential growth phase were harvested and counted for tumor inoculation. Each mouse was inoculated subcutaneously at the right flank with Z-138 tumor cells ( $5 \times 10^6$  cells/mouse, 50% Matrigel) in 0.2 ml mixture of base media and Matrigel (IMDM:

Matrigel = 100:100) for tumor development. The treatments were started when the tumor size reached 152.98 mm<sup>3</sup> for the tumor efficacy study (day 14 post inoculation). Tumor bearing mice were block randomized into 13 groups and each group has 10 mice. Mice were dosed with either Vehicle [0.5% methylcellulose (Sigma #M0430, St. Louis, MO) or GSK3326595D in vehicle at 0.2, 0.5, 1.4, 4.2, 12.5, 25, 50, 100 mg/kg twice daily, and 50, 100, 200 mg/kg once daily. Twice daily doses were administered 12 hour between doses.

All the procedures related to animal handling, care and the treatment in this study were performed according to the guidelines approved by the Institutional Animal Care and Use Committee (IACUC) of Shanghai Chempartner following the guidance of the Association for Assessment and Accreditation of Laboratory Animal Care (AAALAC). At the time of routine monitoring, the animals were checked for any effects of tumor growth and treatments on normal behavior such as mobility, food and water consumption (by looking only), and body weight gain/loss (body weights were measured twice weekly), corneaopacity, matted fur and any other abnormal effect. Death and observed clinical signs were recorded on the basis of the numbers of animals within each subset. Animals that were observed to be in a continuing deteriorating condition or their tumor size exceeding 3000 mm<sup>3</sup> were euthanized prior to death or before reaching a comatose state.

Tumor size was measured twice weekly in two dimensions using a caliper, and the volume was expressed in mm<sup>3</sup> using the formula:  $V = 0.5 a \times b^2$  where a and b were the long and short diameters of the tumor, respectively. The tumor size was then used for calculations of TGI values. Tumor growth inhibition (TGI) was calculated according to the following equation:

$$TGI (\%) = \left( 1 - \frac{(TV_{Treatment,Day 22} - TV_{Treatment,Day 0})}{(TV_{Control,Day 22} - TV_{Control,Day 0})} \right) * 100\%$$

Treatment groups with limited efficacy were euthanized on treatment day 22, and sampling was 2 hours post the last dose. Subsequently tumors were flash frozen and pulverized.

#### SDMA ELISA in Z-138 xenograft

SDMA inhibition in frozen tumor powder samples was analyzed by ELISA, as described earlier.

#### p53 IHC in Z-138 xenograft

Performed IHC detection by using HRP/DAB IHC detection kit (ABC kit, #ab64261) and following the manufacturer's protocol. Anti-p53 rabbit monoclonal, clone SP5 from Thermo Scientific # MA5-16387), used as primary antibody for IHC. Images were taken



with AxioVision software, and cell staining intensity was quantified using the Meta Imaging Series software from Molecular Devices.

### Gene expression analysis in Z-138 xenograft

Z-138 xenograft tumors were treated with various doses of GSK3326595 QD (50, 100 and 200 mg/kg) and BID (3, 6, 12.5, 25, 50 and 100 mg/kg) and collected at 2 hours post last dose. Mouse tissue samples were resuspended in QIAzol (Qiagen #79306) lysis reagent and vortexed to completely homogenize lysate. Samples were pre-cleared by MaXtract High Density tubes (Qiagen #129056) and RNA was isolated by RNeasy Mini kit (Qiagen #74106). Then, RT-PCR was performed with High Capacity Reverse Transcription reagents (ABI #4374966), followed by qPCR (ABI Taqman Fast Advanced Master mix, cat # 4444557) analysis on ABI ViiA7 real-time PCR machine using the Fast TaqMan  $\Delta\Delta C_t$  method. A panel of 11 GSK3326595-responsive genes (see “Gene Expression in Z-138 cell line” for gene list and catalog information) was analyzed and normalized to two housekeeping genes, GAPDH and ACTIN. The average fold change in the treatment group vs. the vehicle group as well as the number of genes with higher than 2-fold change in gene expression for each dose were calculated.

### REC-1 efficacy study

We tested GSK3326595 anti-tumor activity in a xenograft model of REC-1, an MCL cell line that is not sensitive at 6 days of exposure to PRMT5 inhibition *in vitro*.

The study consisted of six groups (n = 10) of mice bearing subcutaneous REC-1 tumors on Day 1. Group 1 served as the primary control group and received vehicle 1 (0.5% methylcellulose), orally (p.o.) twice daily to the end of the study (bid to end), first day one dose. Group 2 was given GSK3326595 p.o., at 126.1 mg/kg (79.3% active compound), BID to end, first day one dose. Tumors were measured twice per week. The study endpoint was a mean tumor volume of 2000 mm<sup>3</sup> in the control group or 25 days, whichever came first. The study reached the 2000 mm<sup>3</sup> endpoint on Day 25. The control tumor growth in this study was in line with our historical data although tumors in this group reached endpoint with measurements taken by an alternate technician. For this reason TGI analysis was performed on Day 22.

Treatment outcome was based on percent tumor growth inhibition (%TGI), defined as the percent difference between Day 22 median tumor volumes (MTVs) of treated and control mice. MTV values for groups were compared with the non-parametric Mann-Whitney U test. The results were analyzed and were deemed statistically significant at  $P \leq 0.05$ . A treatment that produced at least 60% TGI was considered to have potential therapeutic activity. Animals were also monitored for partial regression (PR) and complete regression (CR) responses. Treatment tolerability was assessed by body Weight (BW) measurements and frequent observation for clinical signs of treatment-related (TR) side effects.

1. Chan-Penebre E, Kuplast KG, Majer CR, Boriack-Sjodin PA, Wigle TJ, Johnston LD, *et al.* A selective inhibitor of PRMT5 with in vivo and in vitro potency in MCL models. *Nat Chem Biol* **2015**;11(6):432-7 doi 10.1038/nchembio.1810.
2. Knutson SK, Wigle TJ, Warholc NM, Sneeringer CJ, Allain CJ, Klaus CR, *et al.* A selective inhibitor of EZH2 blocks H3K27 methylation and kills mutant lymphoma cells. *Nat Chem Biol* **2012**;8(11):890-6 doi 10.1038/nchembio.1084.
3. Dobin A, Davis CA, Schlesinger F, Drenkow J, Zaleski C, Jha S, *et al.* STAR: ultrafast universal RNA-seq aligner. *Bioinformatics* **2013**;29(1):15-21 doi 10.1093/bioinformatics/bts635.
4. Trapnell C, Hendrickson DG, Sauvageau M, Goff L, Rinn JL, Pachter L. Differential analysis of gene regulation at transcript resolution with RNA-seq. *Nat Biotechnol* **2013**;31(1):46-53 doi 10.1038/nbt.2450.
5. Yu G, Wang LG, Han Y, He QY. clusterProfiler: an R package for comparing biological themes among gene clusters. *OMICS* **2012**;16(5):284-7 doi 10.1089/omi.2011.0118.
6. Shen S, Park JW, Lu ZX, Lin L, Henry MD, Wu YN, *et al.* rMATS: robust and flexible detection of differential alternative splicing from replicate RNA-Seq data. *Proc Natl Acad Sci U S A* **2014**;111(51):E5593-601 doi 10.1073/pnas.1419161111.
7. Livak KJ, Schmittgen TD. Analysis of relative gene expression data using real-time quantitative PCR and the 2<sup>(-Delta Delta C(T))</sup> Method. *Methods* **2001**;25(4):402-8 doi 10.1006/meth.2001.1262.
